1 **Sex differences in pain-related behaviors and clinical progression of disease in**  
2 **mouse models of visceral pain**

3 Abbreviated title: Sex differences in visceral pain in mice

4 Adela M. Francis-Malave<sup>1</sup>, Santiago Martinez Gonzalez<sup>1</sup>, Caren Pichardo<sup>1</sup>, Torri D.  
5 Wilson<sup>1</sup>, Luis G. Rivera<sup>1</sup>, Lauren R. Brinster<sup>2</sup> and Yarimar Carrasquillo<sup>1#</sup>

6

7 <sup>1</sup>National Center for Complementary and Integrative Health, National Institutes of  
8 Health, Bethesda, MD, United States

9 <sup>2</sup>Office of Research Services, Division of Veterinary Resources, National Institutes of  
10 Health, Bethesda, MD, United States

11

12 #Correspondence

13 Yarimar Carrasquillo, PhD

14 National Center for Complementary and Integrative Health

15 National Institutes of Health

16 35 Convent Drive

17 Building 35A / Room 1E-410

18 Bethesda, MD 20892

19 Phone: 301-451-8147

20 Fax: 301-480-0772

21 Email: yarimar.carrasquillo@nih.gov

22

23 Number of text pages: 38 Number of figures and tables: 10

24 **ABSTRACT**

25 Previous studies have reported sex differences in irritable bowel syndrome (IBS) and  
26 inflammatory bowel disease (IBD) patients, including differences in visceral pain  
27 perception. Despite this, sex differences in behavioral manifestations of visceral pain and  
28 underlying pathology of the gastrointestinal tract have been largely understudied in  
29 preclinical research. In this study, we evaluated potential sex differences in spontaneous  
30 visceral nociceptive responses, referred abdominal hypersensitivity, disease progression  
31 and bowel pathology in mouse models of acute and persistent colon inflammation. Our  
32 experiments show that females exhibit more visceral nociceptive responses and referred  
33 abdominal hypersensitivity than males in the context of acute but not persistent colon  
34 inflammation. We further demonstrate that, following acute and persistent colon  
35 inflammation, visceral pain-related behavioral responses in females and males are  
36 distinct, with increases in licking of the abdomen only observed in females and increases  
37 in abdominal contractions only seen in males. During persistent colon inflammation,  
38 males exhibit worse disease progression than females, which is manifested as worse  
39 physical appearance and higher weight loss. However, no measurable sex differences  
40 were observed in persistent inflammation-induced bowel pathology, stool consistency or  
41 fecal blood. Overall, our findings demonstrate that visceral pain-related behaviors and  
42 disease progression in the context of acute and persistent colon inflammation are sex-  
43 dependent, highlighting the importance of considering sex as a biological variable in future  
44 mechanistic studies of visceral pain as well as in the development of diagnostics and  
45 therapeutic options for chronic gastrointestinal diseases.

46 **Keywords:** visceral pain, sex differences, colitis, dextran sulfate sodium (DSS),  
47 intracolonic capsaicin, referred abdominal hypersensitivity.

48

## 49 **INTRODUCTION**

50 Patients with irritable bowel syndrome (IBS), inflammatory bowel disease (IBD),  
51 and other chronic gastrointestinal diseases often manifest altered visceral pain perception  
52 that has been related to the development of visceral hypersensitivity [9,34,47].  
53 Importantly, clinical studies have shown that women with IBS exhibit higher sensitivity to  
54 repetitive rectal distention and report more severe abdominal pain or discomfort than  
55 men, suggesting sex differences in visceral pain perception in IBS [3,4,44]. Sex  
56 differences have also been reported in the clinical manifestation, disease course,  
57 complications, psychiatric comorbidities, central processing of visceral pain and  
58 pathophysiology of IBS and other chronic gastrointestinal disorders [13,26,37,43]. In  
59 contrast, a recent study found no sex differences in visceral pain thresholds to rectal  
60 balloon distensions in healthy young women and men [19], suggesting that baseline  
61 visceral sensitivity is not dependent on sex. Evaluation of the mechanisms underlying sex  
62 differences in visceral sensitivity in human subjects is limited by methodological and  
63 experimental challenges and are, thus, not completely understood [1,11,16]. Preclinical  
64 studies in rodents offer a valuable alternative to evaluate sex-specific factors in chronic  
65 gastrointestinal diseases in a more controlled setting, providing insights towards the  
66 development of more effective diagnostic and treatment options for patients.

67 Preclinical studies evaluating sex differences in visceral sensitivity in rodents have  
68 predominantly measured visceromotor responses to colorectal distension in rats. These

69 studies have shown that visceral sensitivity in rodents is sex-dependent, with females  
70 exhibiting higher visceromotor responses to colonic distension than males at baseline and  
71 after acute inflammation of the colon [23,45]. Sex differences in visceromotor responses  
72 to colonic distention have also been reported in the context of stress, where female rats  
73 exhibit a stronger relationship between early life adversity and the development of stress-  
74 induced visceral hypersensitivity [41]. Separate studies further show that sex hormones  
75 contribute to sex differences in stress-induced visceral hypersensitivity, with estradiol  
76 facilitating and testosterone decreasing stress effects on visceral responses [21]. Despite  
77 this knowledge, sex differences in visceral sensitivity after acute and persistent  
78 inflammation of the bowel remains poorly understood. Evaluating and characterizing  
79 potential sex differences in visceral pain-related responses in mice under pathological  
80 conditions is essential for the evaluation of mechanisms driving sex differences in visceral  
81 pain.

82 In the present study, we systematically evaluated potential sex differences in  
83 visceral pain-related responses using two well-characterized mouse models of chemically  
84 induced visceral hypersensitivity: intracolonic capsaicin, which elicits transient  
85 neurogenic inflammation [28], spontaneous nociceptive responses and referred  
86 abdominal hyperalgesia [29,42]; and the Dextran Sodium Sulfate (DSS) model of colitis,  
87 which elicits prolonged inflammation in the bowel as well as visceral and referred  
88 abdominal hypersensitivity [2,10] (**Figure 1**). Parallel experiments evaluated potential sex  
89 differences in disease progression of DSS-induced colitis and associated bowel  
90 pathology. Our experiments revealed sex differences in pain-related behaviors after acute  
91 colonic irritation as well as in the clinical progression of colitis. Visceral pain-related

92 behaviors and colon pathology after persistent inflammation of the bowel, however, were  
93 similar in males and females. Collectively, these findings set a foundation for future  
94 mechanistic studies of sex differences in visceral pain.

95

## 96 **RESULTS**

### 97 **Female mice display more capsaicin-induced spontaneous pain-related behaviors** 98 **than male mice**

99 To begin evaluating potential sex differences in visceral pain-related behaviors, we  
100 used the intracolonic capsaicin model and measured spontaneous nociceptive responses  
101 in both male and female mice (**Figure 2A**). Spontaneous capsaicin-induced nociceptive  
102 behaviors were defined as licking, stretching, and dragging of the abdomen as well as  
103 abdominal contractions. Consistent with previous reports [28,29], intracolonic application  
104 of capsaicin (0.01%) elicited robust pain-related behaviors that were significantly ( $p <$   
105  $0.0001$ ) higher than those observed following an intracolonic injection of vehicle in female  
106 mice (**Figure 2B**). In marked contrast, however, spontaneous pain-related behaviors  
107 were indistinguishable in male mice following the intracolonic administration of 0.01%  
108 capsaicin or vehicle control (**Figure 2B**). To determine if male mice can display capsaicin-  
109 induced hypersensitivity, we next injected mice with a higher dose of capsaicin (0.03%).  
110 As illustrated in **Figure 2C**, intracolonic administration of 0.03% capsaicin elicited  
111 significant ( $p = 0.0010$ ) increases in spontaneous pain-related behaviors in males,  
112 compared to vehicle-injected mice. These results demonstrate that capsaicin-induced  
113 spontaneous nociceptive responses are sex-dependent, with higher doses of capsaicin  
114 required in males than in females to elicit comparable nociceptive behavioral responses.

115           The individual components contributing to the total number of capsaicin-induced  
116 nociceptive behaviors were analyzed individually to identify which specific behaviors  
117 contribute to the observed sex differences (**Figure 2D-K**). Consistent with the results  
118 observed in the cumulative analysis, females injected with 0.01% capsaicin displayed  
119 significant increases in most behavioral parameters when compared to control vehicle-  
120 injected females. Thus, female mice injected with 0.01% capsaicin displayed a significant  
121 ( $p < 0.01$ ) increase in the number of licking bouts (**Figure 2D**), dragging bouts (**Figure**  
122 **2F**) and stretching bouts (**Figure 2H**), compared to vehicle-injected females. The number  
123 of contraction bouts was the only parameter in females that was indistinguishable  
124 between capsaicin- and vehicle-injected mice (**Figure 2J**). In marked contrast and  
125 consistent with the results observed in the cumulative behavioral analysis, all the  
126 parameters measured were indistinguishable between vehicle- and capsaicin-injected  
127 male mice (**Figure 2D, 2F, 2H, 2J**), confirming the lack of measurable behavioral  
128 hypersensitivity in male mice following intracolonic injection of 0.01% capsaicin.

129           Evaluation of the individual behavioral components in male mice injected with a  
130 higher dose of capsaicin (0.03%) revealed that the capsaicin-induced increases in  
131 behavioral responses observed at this concentration were mainly driven by significant ( $p$   
132  $< 0.01$ ) increases in abdominal dragging and contraction bouts (**Figure 2G, 2K**) but not  
133 by changes in licking or stretching of the abdomen (**Figure 2E, 2I**). Together, these results  
134 highlight that the behavioral manifestation of capsaicin-induced visceral hypersensitivity  
135 is sexually dimorphic, with increases in licking and stretching of the abdomen observed  
136 in females only and increases in abdominal contractions seen solely in male mice. The

137 common behavioral manifestation observed between sexes following intracolonic  
138 capsaicin administration was increases in dragging of the abdomen.

139 Previous studies have indicated that intracolonic capsaicin elicits freezing  
140 behaviors in a dose-dependent manner [6]. Consistent with these findings, the time spent  
141 freezing was significantly ( $p < 0.05$ ) higher in females following intracolonic injection of  
142 0.01% capsaicin than in females after the injection of vehicle control (**Figure 2L**). In line  
143 with the sex differences presented above, no measurable differences were observed in  
144 the time spent freezing in male mice injected with 0.01% capsaicin when compared to  
145 vehicle control (**Figure 2L**). Time spent freezing, however, was significantly ( $p < 0.01$ )  
146 higher in males when a higher dose of capsaicin (0.03%) was used, compared with  
147 vehicle control (**Figure 2M**). These results demonstrate that while both males and  
148 females exhibit capsaicin-induced freezing, males require a higher dose of capsaicin than  
149 females to display freezing behaviors, further confirming that the manifestation of  
150 capsaicin-induced nociceptive responses is sex-dependent and that females are more  
151 hypersensitive.

152

### 153 **Clinical progression of disease in a DSS-induced mouse model of colitis is sexually** 154 **dimorphic**

155 The DSS model of colitis was used to evaluate sex differences in clinical  
156 progression of disease as well as visceral pain-related responses and referred abdominal  
157 sensitivity in mice. Male and female mice were treated with either 2.5% DSS or water, ad  
158 libitum for seven days (**Figure 3A**). Disease Activity Index (DAI), defined as a cumulative  
159 score based on the percentage of weight loss, stool consistency, presence of fecal blood

160 and physical appearance (**Table 1**), was calculated daily to monitor the clinical  
161 progression of colitis. As illustrated in **Figure 3B**, the DAI score was dependent on the  
162 dose of DSS administered, with increasing percent of DSS resulting in higher DAI score.  
163 The rest of the experiments in this study were performed using 2.5% DSS which  
164 consistently elicited disease in all mice but was not at ceiling level.

165 Consistent with previous studies [2,10,39], 2.5% DSS treatment in drinking water  
166 resulted in increases in DAI scores in both males and females in a time-dependent  
167 manner, with higher DAI scores as the days of treatment progressed. As expected, DAI  
168 scores in DSS-treated male and female mice were significantly ( $p < 0.0001$ ) higher than  
169 scores in their respective water controls, validating that DSS treatment induces a  
170 symptom profile consistent with colitis in both sexes (**Figure 3C**). Notably, DSS-treated  
171 male mice displayed significantly ( $p = 0.0031$ ) higher DAI scores when compared to  
172 female mice, demonstrating that male mice have worse clinical progression of colitis than  
173 female mice.

174 To dissect out the components within the cumulative DAI scores that contribute to  
175 the observed sex differences in the progression of colitis, we analyzed and compared  
176 each disease parameter individually in both male and female mice (**Figure 3D-G**). As  
177 predicted, DSS-treated male and female mice showed higher scores than their respective  
178 water controls in all the individual DAI components evaluated. Similar to the composite  
179 DAI scores, the progression of the individual disease components was also time-  
180 dependent, with higher scores observed with treatment progression in both males and  
181 females. While DSS-induced changes in body weight, physical appearance, and stool  
182 consistency were observed within a few days of treatment (**Figure 3D, E and F**), the



183 presence of blood in the stool was not observed until days 4-6 after treatment (**Figure**  
184 **3G**).

185 Comparison of the individual disease components in males and females further  
186 revealed that the sex differences observed in the composite DAI scores in DSS-treated  
187 mice arise from differences in the percentage of body weight loss and physical  
188 appearance scores but not from differences in the scores for stool consistency or fecal  
189 blood. Thus, as shown in **Figure 3D**, while both DSS-treated male and female mice lost  
190 weight during the days of treatment, the percentage of weight loss over time was  
191 significantly ( $p = 0.0193$ ) higher in male than in female mice. Male mice also displayed  
192 worse DSS-induced changes in physical appearance than female mice, with a  
193 significantly ( $p = 0.0002$ ) higher appearance score measured in male than in female mice  
194 (**Figure 3E**). In contrast, stool consistency and fecal blood scores were comparable in  
195 male and female mice for the duration of the DSS treatment (**Figure 3F-G**), demonstrating  
196 that these two disease components are not sex-dependent.

197 Evaluation of the time-course for DSS-induced disease progression further  
198 revealed that the onset of symptoms associated with colitis is also sex-dependent (**Table**  
199 **2**). DSS-treated males, for example, exhibited significant ( $p = 0.0042$ ) changes in  
200 cumulative DAI scores at treatment day 1 whereas female mice did not exhibit significant  
201 ( $p = 0.0157$ ) changes until treatment day 2. Sex differences in symptom onset consistent  
202 with colitis were most pronounced in DSS-induced changes in body weight where males  
203 started to lose significant ( $p = 0.0124$ ) weight from treatment day 1 while females did not  
204 display significant ( $p = 0.0098$ ) DSS-induced weight loss until treatment day 7. Similarly,  
205 males start to exhibit significantly ( $p < 0.0001$ ) worse appearance scores on day 2 of DSS

206 treatment while the onset for significant ( $p = 0.0165$ ) changes in appearance scores in  
207 females is on day 4. Consistent with the lack of sex differences in DSS-induced changes  
208 in stool consistency and presence of blood in the stool, analysis of the onset of changes  
209 in these two parameters was comparable in both sexes. Thus, significant ( $p < 0.05$ ) DSS-  
210 induced changes in stool consistency scores were first observed on treatment day 2 and  
211 significant ( $p < 0.05$ ) changes in fecal blood scores were observed on treatment day 6 in  
212 both male and female mice.

213 Altogether, these results demonstrate that while both male and female mice  
214 treated with 2.5% DSS develop a clinical profile consistent with colitis, marked sex  
215 differences are observed in both the severity and onset of symptoms with males  
216 consistently exhibiting worse presentation of symptoms compared to females.

217

### 218 **Motivation to groom is comparable in both sexes after DSS-induced colitis**

219 The experiments described above revealed worse physical appearance in DSS-treated  
220 males compared to females (**Figure 3E**). To assess if differential motivation in self-  
221 grooming behavior contributes to sex differences in DSS-induced changes in physical  
222 appearance, we performed the splash test in control and DSS-treated male and female  
223 mice while simultaneously scoring coat states to monitor changes in physical appearance  
224 as a function of time (**Figure 4A**). Immediately after sucrose solution application, all  
225 animals had a maximum coat state score independently of sex or DSS/water treatment  
226 (**Figure 4B**). The coat state in control male and female mice returned to baseline 50  
227 minutes after sucrose solution application. Consistent with the appearance results shown  
228 in **Figure 3E**, the coat state of DSS-treated male and female mice did not return to

229 baseline, displaying a scruffy and humid physical appearance for the duration of the  
230 experiment. Analysis of the total time spent grooming revealed, however, that control and  
231 DSS-treated male and female mice spend comparable time grooming (**Figure 4C**),  
232 suggesting that self-grooming motivation does not contribute to worse physical  
233 appearance in DSS-treated animals independently of sex.

234

### 235 **Capsaicin-induced hypersensitivity is comparable in male and female mice after** 236 **DSS-induced colitis, but the behavioral manifestation is sex-dependent**

237 Altered pain perception in patients with Irritable Bowel Syndrome (IBS) and other  
238 functional gastrointestinal disorders has been associated with the development of visceral  
239 pain hypersensitivity [9,36]. Thus, the model of intracolonic capsaicin was used to  
240 evaluate spontaneous visceral pain-related behaviors in male and female mice treated  
241 with 2.5% DSS as a model of IBS, IBD and other gastrointestinal disorders (**Figure 5A**).  
242 Consistent with the results observed in naïve female mice (**Figure 2**), DSS-treated  
243 females displayed a significant ( $p < 0.0001$ ) increase in the total number of spontaneous  
244 nociceptive behaviors upon intracolonic administration of 0.01% capsaicin compared to  
245 respective control mice injected with vehicle (**Figure 5B**). Interestingly, unlike naïve male  
246 mice (**Figure 2**), DSS-treated males showed a significant ( $p < 0.001$ ) increase in the total  
247 number of spontaneous nociceptive behaviors upon intracolonic administration of 0.01%  
248 capsaicin compared to those injected with vehicle control (**Figure 5B**).

249 To identify the specific pain-related behaviors contributing to capsaicin-induced  
250 visceral hypersensitivity observed in both sexes, the individual components that comprise  
251 the total number of pain-related behaviors were analyzed (**Figure 5C-F**). Consistent with

252 the results observed in naïve female mice (**Figure 2**), DSS-treated females showed a  
253 significant ( $p < 0.01$ ) increase in the number of capsaicin-induced licking (**Figure 5C**),  
254 dragging (**Figure 5D**) and freezing responses (**Figure 5G**) compared to vehicle-treated  
255 females while the number of contraction bouts (**Figure 5F**) were indistinguishable  
256 between capsaicin- and vehicle-treated females. In contrast, unlike the capsaicin-induced  
257 increases in stretching bouts seen in naïve female mice (**Figure 2**), capsaicin and vehicle-  
258 injected females displayed comparable stretching bouts after DSS treatment (**Figure 5E**).

259 Our experiments in naïve male mice showed that both the cumulative and  
260 individual spontaneous pain-related behaviors were comparable in mice injected with  
261 0.01% capsaicin or vehicle control (**Figure 2**). In contrast with these results, evaluation  
262 of the individual capsaicin-induced pain-related behaviors after DSS-induced colitis  
263 showed significant ( $p < 0.05$ ) increases in the number of dragging (**Figure 5D**) and  
264 stretching bouts (**Figure 5E**) after intracolonic injection of 0.01% capsaicin, compared to  
265 intracolonic vehicle control injections. Consistent with the results observed in naïve male  
266 mice, however, the number of licking (**Figure 5C**) and contraction bouts (**Figure 5F**) as  
267 well as time spent freezing (**Figure 5G**) were indistinguishable in capsaicin and vehicle-  
268 injected DSS-treated males. Collectively, these results demonstrate that both sexes  
269 develop capsaicin-induced hypersensitivity to intracolonic application of 0.01% capsaicin  
270 after DSS-induced colitis. The manifestation of hypersensitivity, however, was sex-  
271 dependent, with both sexes displaying increases in dragging behavior (**Figure 5D**) but  
272 only females showing increases in licking and freezing behaviors (**Figure 5C and 5G**)  
273 and only males displaying increases in stretching behaviors (**Figure 5E**).

274

275 **Referred abdominal hypersensitivity is sex-dependent after acute but not**  
276 **persistent colon inflammation**

277 Previous studies have shown that following intracolonic administration of capsaicin or  
278 DSS-induced colitis, mice display referred abdominal hypersensitivity, manifested as an  
279 increase in the frequency of pain-related responses to tactile stimulation of the abdomen  
280 during the von Frey Test (Laird, Martinez-Caro et al. 2001, Jain, Hassan et al. 2015). The  
281 next set of experiments aimed at evaluating potential sex differences in baseline  
282 responses to tactile stimulation of the abdomen using a 0.16g von Frey filament as well  
283 as in referred abdominal hypersensitivity after acute and persistent colon inflammation,  
284 induced by intracolonic administration of 0.01% capsaicin or DSS in drinking water,  
285 respectively (**Figure 6A**). Response frequency was indistinguishable between males and  
286 females in control conditions (**Figure 6B**), demonstrating that baseline responses to  
287 tactile stimulation of the abdomen are not sex dependent. Consistent with previous  
288 reports [29], intracolonic injection of 0.01 % capsaicin significantly ( $p < 0.001$ ) increased  
289 response frequency to tactile stimulation of the abdomen in female mice compared to  
290 intracolonic vehicle control injections (**Figure 6B**). In contrast, response frequencies were  
291 indistinguishable in male mice following intracolonic administration of 0.01% capsaicin or  
292 vehicle control. These findings are consistent with the higher capsaicin-induced  
293 spontaneous nociceptive visceral responses we observe in females (**Figure 2**), further  
294 demonstrating that referred abdominal hypersensitivity is also sex-dependent in the  
295 context of acute colon inflammation.

296 Evaluation of DSS-induced referred abdominal hypersensitivity in males and  
297 females revealed that both male and female mice displayed significant ( $p < 0.0001$ )

298 increases in response frequencies to tactile stimulation of the abdomen using a 0.16g von  
299 Frey filament after intracolonic administration of 0.01% capsaicin when compared to  
300 animals injected with intracolonic vehicle control (**Figure 6B**). Further analyses showed  
301 that, as expected, capsaicin-induced hypersensitivity to tactile stimulation is potentiated  
302 by DSS-induced persistent colon inflammation, with both sexes showing a significant ( $p$   
303  $< 0.05$ ) increase in response frequencies to tactile stimulation of the abdomen after  
304 intracolonic administration of 0.01% capsaicin in the context of DSS-induced colitis when  
305 compared to control mice injected with 0.01% capsaicin. These combined results are  
306 consistent with our findings showing that spontaneous capsaicin-induced visceral  
307 responses in the context of DSS-induced colitis is not sex-dependent (**Figure 5**) and  
308 further demonstrate that referred abdominal hypersensitivity in the context of persistent  
309 colon inflammation is also not sex-dependent.

310

### 311 **DSS-induced bowel pathology is comparable in males and females**

312 The results presented above show that clinical progression of disease and  
313 behavioral manifestation of hypersensitivity following DSS treatment are sexually  
314 dimorphic. To gain insight into whether DSS-induced bowel pathology contributes to the  
315 observed sex differences, colon lengths and histopathological analysis of the bowels of  
316 control and DSS-treated mice of both sexes were evaluated (**Figure 7A**). Bowel length is  
317 commonly used to evaluate macroscopic manifestations of gastrointestinal disease in  
318 rodents, with shortening of the bowel reported in many gastrointestinal conditions,  
319 including DSS-induced colitis [2,39]. Consistent with previous reports, analysis of our  
320 experiments showed that both sexes exhibit significant ( $p < 0.0001$ ) shortening of the

321 bowel after DSS treatment when compared to their respective water controls (**Figure 7B-**  
322 **C**). Further analysis revealed that female bowels are significantly ( $p < 0.05$ ) shorter than  
323 male bowels in both control and DSS-treated mice. Comparison of the change in average  
324 bowel length in control and DSS-treated mice reveals, however, that both sexes display  
325 a bowel shortening of ~19% after DSS treatment, when compared to their respective  
326 water controls (**Figure 7C**). These results demonstrate that the manifestation of DSS-  
327 induced colitis is comparable in males and female mice at the gross pathological level.

328 Histopathological analysis of the colon of both control and DSS-treated male and  
329 female mice was performed to assess bowel pathology at the microscopic level (**Figure**  
330 **7D-H**). Analyses of the cumulative histology score, composed of glands-mucosa,  
331 inflammation and % of colonic tissue affected scores, revealed that DSS induces  
332 increases in histology scores in bowels from both male and female mice in a dose-  
333 dependent manner, with higher histology scores associated with increasing dose of DSS  
334 administered (**Figure 7E**). Consistent with our analysis of gross bowel pathology,  
335 analyses of histology scores showed comparable pathology at the microscopic level  
336 between DSS-treated male and female mice. Analyses of the individual components  
337 further demonstrated comparable damage of the colonic crypts and mucosa (**Figure 7F**),  
338 inflammatory infiltration of leucocytes (**Figure 7G**) and % of colonic tissue affected  
339 (**Figure 7H**) in DSS-treated males and females. Altogether, these results show no  
340 measurable sex difference in DSS-induced gross and microscopic colon pathology.

341

342 **DISCUSSION**

343           Chronic visceral pain is predominantly reported in women and higher pain  
344 sensitivity has been shown in women patients [46]. Despite this, the majority of preclinical  
345 pain studies have focused only on males [35]. The limited inclusion of sex as a biological  
346 variable in preclinical studies results in an incomplete understanding of the biological  
347 processes underlying pain [35]. In this study, we evaluated and characterized potential  
348 sex differences in visceral pain-related responses, disease progression of colitis and  
349 colitis-induced colon pathology using the intracolonic capsaicin and DSS-induced colitis  
350 models of chemically induced visceral hypersensitivity in mice (**Figure 8**). Our behavioral  
351 experiments show sex-dependent differences in visceral pain-related behaviors, with  
352 females exhibiting more pain-related responses and referred abdominal hypersensitivity  
353 than males in the context of acute colon inflammation induced by intracolonic capsaicin  
354 (**Figure 8A-B**). We further show that colitis-induced visceral hypersensitivity and referred  
355 abdominal hypersensitivity are similar between males and females, but the manifestation  
356 of capsaicin-induced behavioral responses is sex-dependent. While both sexes exhibited  
357 dragging, stretching, and freezing in response to intracolonic capsaicin, increases in  
358 licking of the abdomen were only observed in females and increases in abdominal  
359 contractions were only displayed by males (**Figure 8A**). Consistent with other studies  
360 [2,10,39], we also show that progression of DSS-induced colitis is sex-dependent, with  
361 males exhibiting worse clinical progression, manifested as worse appearance and higher  
362 weight loss, than in females (**Figure 8C**). No measurable sex differences were observed,  
363 however, in colitis-induced bowel pathology, stool consistency or fecal blood (**Figure 8D**).  
364 Together, these findings stress the importance of incorporating both sexes when studying  
365 mechanisms that drive clinical and behavioral manifestations of visceral hypersensitivity.



366

## 367 **Behavioral manifestation of visceral pain-related behaviors is sex-dependent**

368 While previous studies consistently show that the model of DSS-induced colitis  
369 and intracolonic capsaicin produce visceral hypersensitivity and referred abdominal  
370 hyperalgesia in both sexes [20,29], potential sex differences in pain-related behaviors in  
371 these two models of visceral pain have not been evaluated. In the present study, we  
372 demonstrated that visceral pain-related behaviors in freely behaving mice is sex-  
373 dependent. We specifically showed that females display higher capsaicin-induced  
374 spontaneous nociceptive responses than males and that the behavioral manifestation of  
375 pain-related responses to intracolonic capsaicin is also dependent on sex, with increases  
376 in licking of the abdomen observed only in females and increases in abdominal  
377 contractions only displayed by males (**Figures 2 and 5**).

378 Sex differences in behavioral outputs have been described previously in other  
379 contexts such as fear and escape behaviors [12,14,27], highlighting the importance of  
380 characterizing behavioral assays in both males and females. Previous studies have  
381 further shown that neural circuits driving distinct pain-related responses, such as paw  
382 withdrawal or licking in response to evoked tactile stimulation, are unique [17]. Our  
383 behavioral experiments showing that male and female mice exhibit distinct behavioral  
384 responses to intracolonic capsaicin suggest that recruitment of neural circuits in  
385 responses to a particular noxious stimulus might be sex-dependent.

386

## 387 **Clinical progression of disease in a mouse model of colitis are sex-dependent**

388           Our experiments showed that DSS treatment induces a clinical profile consistent  
389 with colitis in both male and female mice and that males exhibit a worse clinical  
390 progression of disease (**Figure 3**). The disease activity index (DAI) used to measure  
391 clinical progression of colitis is typically presented as a cumulative score of the following  
392 components: appearance, weight loss, stool consistency and fecal blood  
393 [2,6,10,25,32,39]. Analysis of the individual DAI components in the present study  
394 revealed that higher DAI scores in males are driven by greater weight loss and worse  
395 appearance but that DSS-induced changes in stool consistency and fecal blood are  
396 similar between sexes. The lack of measurable sex differences in stool consistency and  
397 fecal blood, together with the comparable DSS-induced shortening of the bowel (**Figure**  
398 **7**) suggests that gross pathology of the bowel is not the driving force behind the sex  
399 differences in weight loss. Weight loss is a hallmark in animal models of experimental  
400 colitis and has been associated with decreases in food intake and/or changes in  
401 metabolic rates, locomotor activity or body fat content [33]. Similarly, weight loss in IBD  
402 patients has been related with decreased appetite, alterations in metabolic hormones  
403 and/or malabsorption of nutrients [7]. Future studies to explore whether DSS induces sex-  
404 dependent changes in food consumption and/or metabolic alterations that contribute to  
405 colitis-induced weight loss are needed.

406           Despite the worse physical appearance seen in DSS-treated males (**Figure 3E**),  
407 coat state and time spent grooming after sucrose solution application in the splash test  
408 was similar between males and females (**Figure 4**). These results are consistent with  
409 findings from previous studies in males [20] and suggest that motivation to self-groom is  
410 not affected after DSS-induced colitis and it is not sex-dependent. When interpreting

411 these findings, it is important to consider that sucrose solution application creates an  
412 acute challenge that experimentally evokes grooming. Motivation to groom when  
413 presented with an acute challenge like sucrose application might be different to motivation  
414 to self-groom for daily upkeep. Previous studies have shown that self-grooming is an  
415 evolutionary conserved and innate behavior in mice that involves a complex sequencing  
416 pattern and contributes to hygiene maintenance, thermoregulation, social  
417 communication, and other biological processes [24]. The worse physical appearance in  
418 DSS-treated males, combined with the lack of sex or treatment-dependent effect on time  
419 spent grooming in response to sucrose application, suggest that males are less efficient  
420 at grooming than females after the induction of colitis.

421 An important caveat of the experiments presented here is that the same  
422 percentage of DSS was used in males and females, despite males having greater initial  
423 body weight than females. Consequently, the dose of DSS per body weight is most likely  
424 lower in males than it is in females. Whether sex differences in metabolism and excretion  
425 rates of DSS influence the observed DSS-induced phenotypes is also unknown. Despite  
426 potential differences in the absolute DSS dose intake, however, males exhibit worse  
427 disease progression than females, further emphasizing sexual dimorphism in disease  
428 progression in the context of colitis.

429

### 430 **Comparison with other studies and potential translational application**

431 Our behavioral experiments show that female mice display more capsaicin-  
432 induced spontaneous visceral pain-related responses than males (**Figure 2**). These  
433 results are consistent with previous studies showing that female rats have higher

434 visceromotor responses to noxious colorectal distension at baseline and after intracolonic  
435 injection of mustard oil than male rats [15,22,23]. Measurements of visceromotor  
436 responses to colorectal distension are typically performed in lightly anesthetized or  
437 loosely restrained rats, which may confound the behavioral outcomes measured and limit  
438 the interpretation of findings. The consistencies between our behavioral findings in freely  
439 behaving mice and those in previous studies using lightly anesthetized or loosely  
440 restrained rats demonstrate that sex differences in visceral pain-related behaviors are  
441 comparable and can be equally studied in freely behaving mice or in rats under light  
442 anesthesia or loosely restrained. Our results showing that female rodents display higher  
443 visceral sensitivity than males are also consistent with clinical studies in humans that also  
444 show higher visceral sensitivity in women than men [3,4,44], validating the use of rodent  
445 preclinical models to mechanistically study sex differences in visceral pain. Lastly, the  
446 demonstration that sex differences in visceral pain-related responses are recapitulated in  
447 mice is important as they offer a more enriched repertoire of molecular genetic tools to  
448 study behavior at circuit and mechanistic levels.

449         It is important to note that our experiments showed that visceral hypersensitivity in  
450 the context of DSS-induced colitis is not sex-dependent (**Figure 5**). These findings  
451 contrast with clinical studies that report that female IBS patients exhibit higher visceral  
452 sensitivity and report more severe abdominal pain or discomfort than men (Chang, Mayer  
453 et al. 2006, Tang, Yang et al. 2012, Camilleri 2020). As discussed above, however, our  
454 experiments also demonstrated that the behavioral manifestation of visceral pain-related  
455 responses in mice is sex-dependent (**Figure 2 and 5**), suggesting that pain perception is  
456 differentially experienced by females and males. Given that pain is a multidimensional

457 experience that comprises affective, cognitive, and somatosensory components, studies  
458 that evaluate these components in humans are needed to understand the mechanisms  
459 driving sex differences in visceral pain. Based on these results, improved diagnostic and  
460 therapeutic options for pain relief can be developed.

461 At a pathological level, consumption of DSS in drinking water has been shown to  
462 disturb the colonic lumen structure, eliciting an inflammatory response that emulates  
463 inflammatory bowel diseases (IBD) such as ulcerative colitis (UC) and Crohn's disease  
464 (CD) [30]. Consistent with previous reports [39], we also show that DSS induces  
465 shortening and histopathological changes in the colon (**Figure 7**) that resemble the  
466 shortening of the small bowel and histopathological features observed in patients with  
467 ulcerative colitis (UC) and Crohn's disease (CD) [38], further validating the applicability of  
468 this model to study IBDs. Notably, however, while previous studies have reported sex  
469 differences in DSS-induced bowel shortening and histopathology [2,10,31], our  
470 experiments showed that bowel pathology is comparable between sexes. These  
471 discrepancies could be due to differences in strain used, DSS supplier or animal facility-  
472 specific factors that have been previously shown to strongly influence DSS experiments  
473 [5,31].

474 The experiments in the present study provide evidence for sex differences in  
475 visceral pain-related behaviors and clinical progression of colitis in preclinical models of  
476 acute and persistent colonic irritation. Together, these results highlight the importance of  
477 considering sex as a biological variable in both preclinical and clinical pain studies.

478

## 479 **MATERIALS AND METHODS**

## 480 **Subjects**

481 All animal procedures were performed in accordance with the guidelines of the National  
482 Institutes of Health (NIH) and were approved by the Animal Care and Use Committee of  
483 the National Institute of Neurological Disorders and Stroke and the National Institute on  
484 Deafness and other Communication Disorders. Adult male and female Swiss-Webster  
485 mice (Taconic Farms) between 8-13 weeks old were used for all experiments. Littermates  
486 were randomly assigned to experimental groups and group housed (up to 5 mice per  
487 cage) under reversed 12 h light/dark cycle (9 pm to 9 am light). One week prior to  
488 experiments, mice were housed in pairs in clean home cages separated by a perforated  
489 Plexiglas divider. Food and water were provided ad libitum. Prior to all behavioral  
490 experiments, mice were handled as previously described for at least 5 days to minimize  
491 potential stress effects associated with handling [18]. Male and female mice were never  
492 tested simultaneously in the same behavior room. All experimental procedures were  
493 performed by an observer blind to experimental treatment and replicated at least 3 times.

494

## 495 **DSS-induced Model of Colitis**

496 Male and female mice were randomly assigned to drinking water (control group) or 2.5%  
497 (wt/vol) Dextran Sulfate Sodium (DSS) salt (reagent-grade, mol. wt. 36 to 50 kDa; MP  
498 Biomedicals, #16011050) dissolved in drinking water to induce colitis (experimental  
499 group), ad libitum for seven days. On day 7, mice were switched to regular water ad  
500 libitum for the duration of the experiment. Intracolonic capsaicin, referred abdominal  
501 sensitivity and bowel sample collection experiments were performed on day 8 (**Figure**  
502 **1A**). Each day, along with the handling of the mouse, the disease activity index (DAI) was

503 logged by an investigator blind to experimental treatment to evaluate and score disease  
504 progression as previously described (Kim et al., 2012). The DAI is a composite of scores  
505 for weight loss, appearance, stool consistency, and blood presence in the stool using a  
506 Hemocult card (Beckman Coulter). See **Table 1**.

507

### 508 **Intracolonic Capsaicin**

509 On experiment day 8 (see full experimental timeline above and in **Figure 1A**), male or  
510 female mice were habituated (for 1hr) and tested on an elevated mesh platform in  
511 individual 11 × 11 × 13 cm ventilated opaque white Plexiglas boxes. A mirror was placed  
512 at 45-degree angle under the mesh platform to allow full visualization of the animals.  
513 Intracolonic injections were performed as previously described [40]. Briefly, mice were  
514 anesthetized with 1% isoflurane in an induction chamber, and then kept lightly  
515 anesthetized with 0.5%–1% isoflurane at a flow rate of 0.5 L/min. A light layer of petroleum  
516 jelly (Vaseline) was applied to the peri-anal area and tubing to avoid the stimulation of  
517 somatic areas and ease tube insertion. Capsaicin (0.01% or 0.03%) was prepared using  
518 a stock solution of capsaicin (Sigma Aldrich) diluted in ethanol, Tween80, and saline  
519 (10/10/80, respectively). 50µl of capsaicin (0.01% or 0.03%) or vehicle control (10%  
520 ethanol, 10% Tween 80, and 80% saline) was slowly injected via PE-10 non-toxic, sterile  
521 polyethylene tubing (0.28 mm ID / 0.61 mm OD; Daigger Scientific) with a rounded tip  
522 connected to a blunted 30G x 1/2 needle (BD PrecisionGlide) and 1 cc syringe (Terumo)  
523 that was gently introduced 4 cm into the colon via the anus. Spontaneous nociceptive  
524 responses to intracolonic capsaicin (or vehicle control) were measured for 20 minutes  
525 immediately following intracolonic injections. Spontaneous nociceptive responses were

526 defined as licking of abdomen, stretching of abdomen, dragging and abdominal  
527 contractions. The time spent freezing following the injection was also measured during  
528 the 20-minute test period.

529

### 530 **Referred Abdominal Hypersensitivity**

531 Referred abdominal hypersensitivity was evaluated 45 minutes after capsaicin (or vehicle  
532 control) intracolonic injection as described previously [40]. The abdominal hair of all test  
533 mice was removed (24 h) before testing with a depilatory (Nair). A 0.16g von Frey filament  
534 (North Coast Medical, Inc. San Jose, CA) was applied to the abdomen for approximately  
535 1–2 s, with a stimulus interval of 15 s. Positive responses were defined as a rapid  
536 withdrawal, jumping, licking or abdominal contractions immediately following application  
537 of the von Frey filament to the abdomen. A total of 10 trials were performed and the  
538 number of positive responses per animal were recorded and reported as response  
539 frequency.

540

### 541 **Splash Test**

542 On experiment day 8 (see full experimental timeline above and in **Figure 1A**), control and  
543 DSS-treated male and female mice were individually transferred to a new home cage with  
544 regular bedding and were habituated in them for at least 1hr. Each mouse received two  
545 sprays of 10% sucrose solution on their dorsal coat. Immediately following sucrose  
546 solution application, the coat state of the animals was scored every 10 min for 1hr and  
547 every 20 min starting at the 1-hour timepoint until the 2-hours timepoint from the sucrose  
548 solution application. The coat state score was obtained using the following system: 8 =



549 wet, soaked dorsal coat; 4 = scruffy and humid dorsal coat; 2 = dry and smooth lower  
550 back coat but upper back coat is still scruffy and/or humid; 1 = mostly dry and smooth  
551 dorsal coat with a few scruffy patches and 0 = completely dry and smooth dorsal coat.  
552 The time spent in grooming behavior was measured during a five-minute period  
553 immediately after sucrose solution application as well as 35 and 65 minutes after sucrose  
554 solution application. The observer was always blind to experimental treatment.

555

### 556 **Bowel Sample Collection and Histopathological Analysis**

557 On experiment day 8 (see full experimental timeline above and in **Figure 1A**), control and  
558 DSS-treated males and females were anesthetized with 1% isoflurane in an induction  
559 chamber and euthanized by cervical dislocation. Bowels were dissected and the colon  
560 was carefully removed to measure its length. The colon was subsequently divided in  
561 proximal, medial, medial/distal, and distal 1 cm sections, fixed in 10% Neutral Buffered  
562 Formaldehyde (Azer Scientific) for 24hrs and stored in 70% ethanol until processing.  
563 Tissue samples were embedded in paraffin blocks, cut in 5 $\mu$ m sections, fixed to glass  
564 slides, and stained with hematoxylin and eosin (H&E) by HistoServ (Germantown, MD).  
565 Histopathological analysis of the tissue samples was performed as previously described  
566 [8,25]. Tissue damage was assessed using a cumulative histology score of glands-  
567 mucosa, inflammation and % of colonic tissue affected. The score for glands-mucosa was  
568 as follows: 0 = no changes in glands-mucosa structure; 1 = loss of up to 1/3 of gland,  
569 crypts lifted off muscularis mucosae; 2 = loss of 2/3 of gland, crypts lifted off muscularis  
570 mucosae, little inflammation, thinning and loss of epithelial cells in the *intact* glands,  
571 cryptitis; 3 = loss of all the glands but the superficial epithelium is intact, mild infiltrate; 4

572 = erosion, ulceration, mild - moderate infiltrate. Inflammation score was defined as 0 =  
573 none to few leucocytes; 1 = mild, some increase in leucocytes at tips of crypts; 2 =  
574 moderate; 3 = severe, dense infiltrate throughout, transmural. Percent of colonic tissue  
575 affected was scored as 1 = 1 – 25%; 2 = 25 – 50%; 3 = 50 – 75%; 4 = 75 – 100 %.  
576 Analyses of the histology score and its individual components were initially performed  
577 separately per anatomical section of the colon collected (i.e. proximal, medial,  
578 medial/distal, and distal). This analysis showed that DSS-induced histopathology is  
579 comparable between all colon sections evaluated within bowels from mice of the same  
580 sex and dose of DSS administered. Based on these results, we calculated the average  
581 score of all 4 colonic sections per mouse for each parameter and used these values for  
582 subsequent graphs and analyses.

583

## 584 **Statistics**

585 Results are expressed as mean  $\pm$  standard errors of the mean (SEM). Analysis was  
586 performed using either Unpaired t-tests (without Welch's correction for variance), Mann-  
587 Whitney U tests, two-way analyses of variance (ANOVA) or two-way analyses of variance  
588 (ANOVA) followed by Tukey's multiple comparison tests or by Šidák's multiple  
589 comparison. All analyses were performed using GraphPad Prism (v. 9) and p values lower  
590 than 0.05 were considered significant and are reported in figure legends.

591

## 592 **Data Availability**

593 All data in this study is available from the corresponding author.

594

595 **AUTHOR CONTRIBUTIONS**

596 Conceptualization, C.P., S.M.G., Y.C., A.M.F.M; Investigation, S.M.G., T.D.W., L.G.R.,  
597 A.M.F.M; Data Analysis, A.M.F.M, S.M.G., T.D.W., L.G.R., L.R.B., Y.C.; Writing –  
598 Original Draft, A.M.F.M, Y.C.; Writing – Review & Editing,; Supervision, Y.C.; Funding  
599 Acquisition, Y.C.

600

601 **ACKNOWLEDGEMENTS**

602 This research was supported by the National Center for Complementary and Integrative  
603 Health Intramural Research Program. We would like to thank Dr. David Shurtleff for  
604 feedback on this study, Uriah Contreras for technical assistance in the project and Dr.  
605 Mark Pitcher for training and assistance with the behavioral experiments. We would also  
606 like to thank the National Institutes of Neurological Disorder Mouse Facility staff for their  
607 vital work in animal husbandry. Cartoons in Figures 1-7A, 7D and 8 were created with  
608 BioRender.com.

609

610 **COMPETING INTERESTS**

611 The authors declare no conflict of interests.

612

613 **REFERENCES**

614 [1] Arendt-Nielsen L, Bajaj P, Drewes AM. Visceral pain: gender differences in response  
615 to experimental and clinical pain. Eur J Pain 2004;8(5):465-472.

- 616 [2] Babickova J, Tothova L, Lengyelova E, Bartonova A, Hodosy J, Gardlik R, Celec P.  
617 Sex Differences in Experimentally Induced Colitis in Mice: a Role for Estrogens.  
618 Inflammation 2015;38(5):1996-2006.
- 619 [3] Camilleri M. Sex as a biological variable in irritable bowel syndrome.  
620 Neurogastroenterol Motil 2020;32(7):e13802.
- 621 [4] Chang L, Mayer EA, Labus JS, Schmulson M, Lee OY, Olivas TI, Stains J, Naliboff  
622 BD. Effect of sex on perception of rectosigmoid stimuli in irritable bowel  
623 syndrome. Am J Physiol Regul Integr Comp Physiol 2006;291(2):R277-284.
- 624 [5] Chassaing B, Aitken JD, Malleshappa M, Vijay-Kumar M. Dextran sulfate sodium  
625 (DSS)-induced colitis in mice. Curr Protoc Immunol 2014;104:15 25 11-15 25 14.
- 626 [6] Eijkelkamp N, Kavelaars A, Elsenbruch S, Schedlowski M, Holtmann G, Heijnen CJ.  
627 Increased visceral sensitivity to capsaicin after DSS-induced colitis in mice:  
628 spinal cord c-Fos expression and behavior. Am J Physiol Gastrointest Liver  
629 Physiol 2007;293(4):G749-757.
- 630 [7] Elsherif Y, Alexakis C, Mendall M. Determinants of Weight Loss prior to Diagnosis in  
631 Inflammatory Bowel Disease: A Retrospective Observational Study.  
632 Gastroenterol Res Pract 2014;2014:762191.
- 633 [8] Erben U, Loddenkemper C, Doerfel K, Spieckermann S, Haller D, Heimesaat MM,  
634 Zeitz M, Siegmund B, Kuhl AA. A guide to histomorphological evaluation of  
635 intestinal inflammation in mouse models. Int J Clin Exp Pathol 2014;7(8):4557-  
636 4576.

- 637 [9] Farzaei MH, Bahramsoltani R, Abdollahi M, Rahimi R. The Role of Visceral  
638 Hypersensitivity in Irritable Bowel Syndrome: Pharmacological Targets and Novel  
639 Treatments. *J Neurogastroenterol Motil* 2016;22(4):558-574.
- 640 [10] Gao Y, Postovalova EA, Makarova OV, Dobrynina MT, Mikhailova LP. Sex-Related  
641 Differences in the Morphology and Subpopulation Composition of Colon  
642 Lymphocytes in Experimental Acute Colitis. *Bull Exp Biol Med* 2018;165(4):503-  
643 507.
- 644 [11] Greenspan JD, Craft RM, LeResche L, Arendt-Nielsen L, Berkley KJ, Fillingim RB,  
645 Gold MS, Holdcroft A, Lautenbacher S, Mayer EA, Mogil JS, Murphy AZ, Traub  
646 RJ, Consensus Working Group of the Sex G, Pain SIGotI. Studying sex and  
647 gender differences in pain and analgesia: a consensus report. *Pain* 2007;132  
648 Suppl 1:S26-S45.
- 649 [12] Greiner EM, Muller I, Norris MR, Ng KH, Sangha S. Sex differences in fear  
650 regulation and reward-seeking behaviors in a fear-safety-reward discrimination  
651 task. *Behav Brain Res* 2019;368:111903.
- 652 [13] Greuter T, Manser C, Pittet V, Vavricka SR, Biedermann L, on behalf of Swiss  
653 Ibdnet aowgotSSoG. Gender Differences in Inflammatory Bowel Disease.  
654 *Digestion* 2020;101 Suppl 1:98-104.
- 655 [14] Gruene TM, Flick K, Stefano A, Shea SD, Shansky RM. Sexually divergent  
656 expression of active and passive conditioned fear responses in rats. *Elife* 2015;4.

- 657 [15] Holdcroft A, Sapsed-Byrne S, Ma D, Hammal D, Forsling ML. Sex and oestrous  
658 cycle differences in visceromotor responses and vasopressin release in response  
659 to colonic distension in male and female rats anaesthetized with halothane. *Br J*  
660 *Anaesth* 2000;85(6):907-910.
- 661 [16] Houghton LA, Heitkemper M, Crowell M, Emmanuel A, Halpert A, McRoberts JA,  
662 Toner B. Age, Gender and Women's Health and the Patient. *Gastroenterology*  
663 2016.
- 664 [17] Huang T, Lin SH, Malewicz NM, Zhang Y, Zhang Y, Goulding M, LaMotte RH, Ma  
665 Q. Identifying the pathways required for coping behaviours associated with  
666 sustained pain. *Nature* 2019;565(7737):86-90.
- 667 [18] Hurst JL, West RS. Taming anxiety in laboratory mice. *Nat Methods*  
668 2010;7(10):825-826.
- 669 [19] Icenhour A, Labrenz F, Roderigo T, Siebert C, Elsenbruch S, Benson S. Are there  
670 sex differences in visceral sensitivity in young healthy men and women?  
671 *Neurogastroenterol Motil* 2019;31(9):e13664.
- 672 [20] Jain P, Hassan AM, Koyani CN, Mayerhofer R, Reichmann F, Farzi A, Schuligoi R,  
673 Malle E, Holzer P. Behavioral and molecular processing of visceral pain in the  
674 brain of mice: impact of colitis and psychological stress. *Front Behav Neurosci*  
675 2015;9:177.
- 676 [21] Ji Y, Hu B, Li J, Traub RJ. Opposing Roles of Estradiol and Testosterone on  
677 Stress-Induced Visceral Hypersensitivity in Rats. *J Pain* 2018;19(7):764-776.

- 678 [22] Ji Y, Murphy AZ, Traub RJ. Sex differences in morphine-induced analgesia of  
679 visceral pain are supraspinally and peripherally mediated. *Am J Physiol Regul*  
680 *Integr Comp Physiol* 2006;291(2):R307-314.
- 681 [23] Ji Y, Tang B, Cao DY, Wang G, Traub RJ. Sex differences in spinal processing of  
682 transient and inflammatory colorectal stimuli in the rat. *Pain* 2012;153(9):1965-  
683 1973.
- 684 [24] Kalueff AV, Stewart AM, Song C, Berridge KC, Graybiel AM, Fentress JC.  
685 Neurobiology of rodent self-grooming and its value for translational neuroscience.  
686 *Nat Rev Neurosci* 2016;17(1):45-59.
- 687 [25] Kim JJ, Shajib MS, Manocha MM, Khan WI. Investigating intestinal inflammation in  
688 DSS-induced model of IBD. *J Vis Exp* 2012(60).
- 689 [26] Kim YS, Kim N. Sex-Gender Differences in Irritable Bowel Syndrome. *J*  
690 *Neurogastroenterol Motil* 2018;24(4):544-558.
- 691 [27] King SM. Maturation and gender differences in rodent escape strategies: Possible  
692 implications for preclinical models of anxiety. *Psychobiology* 1999;27(4):513-520.
- 693 [28] Laird JM, Olivar T, Roza C, De Felipe C, Hunt SP, Cervero F. Deficits in visceral  
694 pain and hyperalgesia of mice with a disruption of the tachykinin NK1 receptor  
695 gene. *Neuroscience* 2000;98(2):345-352.
- 696 [29] Laird JMA, Martinez-Caro L, Garcia-Nicas E, Cervero F. A new model of visceral  
697 pain and referred hyperalgesia in the mouse. *Pain* 2001;92(3):335-342.

- 698 [30] Laroui H, Ingersoll SA, Liu HC, Baker MT, Ayyadurai S, Charania MA, Laroui F,  
699 Yan Y, Sitaraman SV, Merlin D. Dextran sodium sulfate (DSS) induces colitis in  
700 mice by forming nano-lipocomplexes with medium-chain-length fatty acids in the  
701 colon. *PLoS One* 2012;7(3):e32084.
- 702 [31] Mahler M, Bristol IJ, Leiter EH, Workman AE, Birkenmeier EH, Elson CO, Sundberg  
703 JP. Differential susceptibility of inbred mouse strains to dextran sulfate sodium-  
704 induced colitis. *Am J Physiol* 1998;274(3):G544-551.
- 705 [32] Maxwell JR, Brown WA, Smith CL, Byrne FR, Viney JL. Methods of inducing  
706 inflammatory bowel disease in mice. *Curr Protoc Pharmacol* 2009;Chapter  
707 5:Unit5 58.
- 708 [33] Melgar S, Bjursell M, Gerdin AK, Svensson L, Michaelsson E, Bohlooly YM. Mice  
709 with experimental colitis show an altered metabolism with decreased metabolic  
710 rate. *Am J Physiol Gastrointest Liver Physiol* 2007;292(1):G165-172.
- 711 [34] Mertz H, Naliboff B, Munakata J, Niazi N, Mayer EA. Altered rectal perception is a  
712 biological marker of patients with irritable bowel syndrome. *Gastroenterology*  
713 1995;109(1):40-52.
- 714 [35] Mogil JS. Qualitative sex differences in pain processing: emerging evidence of a  
715 biased literature. *Nat Rev Neurosci* 2020;21(7):353-365.
- 716 [36] Moshiree B, Zhou Q, Price DD, Verne GN. Central sensitisation in visceral pain  
717 disorders. *Gut* 2006;55(7):905-908.



- 718 [37] Narayanan SP, Anderson B, Bharucha AE. Sex- and Gender-Related Differences  
719 in Common Functional Gastroenterologic Disorders. *Mayo Clin Proc*  
720 2021;96(4):1071-1089.
- 721 [38] Nordgren S, McPheeters G, Svaninger G, Oresland T, Hulten L. Small bowel length  
722 in inflammatory bowel disease. *Int J Colorectal Dis* 1997;12(4):230-234.
- 723 [39] Nyuyki KD, Cluny NL, Swain MG, Sharkey KA, Pittman QJ. Altered Brain  
724 Excitability and Increased Anxiety in Mice With Experimental Colitis:  
725 Consideration of Hyperalgesia and Sex Differences. *Front Behav Neurosci*  
726 2018;12:58.
- 727 [40] Pitcher MH, Nieto FR, Cervero F. Stimulation of cutaneous low threshold  
728 mechanoreceptors in mice after intracolonic capsaicin increases spinal c-Fos  
729 labeling in an NKCC1-dependent fashion. *J Pain* 2013;14(1):57-65.
- 730 [41] Prusator DK, Greenwood-Van Meerveld B. Sex differences in stress-induced  
731 visceral hypersensitivity following early life adversity: a two hit model.  
732 *Neurogastroenterol Motil* 2016;28(12):1876-1889.
- 733 [42] Sanoja R, Tortorici V, Fernandez C, Price TJ, Cervero F. Role of RVM neurons in  
734 capsaicin-evoked visceral nociception and referred hyperalgesia. *Eur J Pain*  
735 2010;14(2):120 e121-129.
- 736 [43] Severs M, Spekhorst LM, Mangen MJ, Dijkstra G, Lowenberg M, Hoentjen F, van  
737 der Meulen-de Jong AE, Pierik M, Ponsioen CY, Bouma G, van der Woude JC,  
738 van der Valk ME, Romberg-Camps MJL, Clemens CHM, van de Meeberg P,

739 Mahmmod N, Jansen J, Jharap B, Weersma RK, Oldenburg B, Festen EAM,  
740 Fidler HH. Sex-Related Differences in Patients With Inflammatory Bowel  
741 Disease: Results of 2 Prospective Cohort Studies. *Inflamm Bowel Dis*  
742 2018;24(6):1298-1306.

743 [44] Tang YR, Yang WW, Wang YL, Lin L. Sex differences in the symptoms and  
744 psychological factors that influence quality of life in patients with irritable bowel  
745 syndrome. *Eur J Gastroenterol Hepatol* 2012;24(6):702-707.

746 [45] Traub RJ, Ji Y. Sex differences and hormonal modulation of deep tissue pain. *Front*  
747 *Neuroendocrinol* 2013;34(4):350-366.

748 [46] Yuan T, Greenwood-Van Meerveld B. Abdominal and Pelvic Pain: Current  
749 Challenges and Future Opportunities. *Frontiers in Pain Research* 2021;2(1).

750 [47] Zhou Q, Verne GN. New insights into visceral hypersensitivity--clinical implications  
751 in IBS. *Nat Rev Gastroenterol Hepatol* 2011;8(6):349-355.

752

753

754

755

756

757

758

759

760 **FIGURE LEGENDS**

761 **Figure 1. Experimental timeline for behavioral and histological experiments in a**  
762 **model of DSS-induced colitis.** Male and female mice were treated with either 2.5% DSS  
763 or water and clinical progression of disease was monitored for 7 days. Spontaneous  
764 responses to intracolonic capsaicin (0.01% or 0.03%) or vehicle control and referred  
765 abdominal sensitivity to tactile stimulation were measured 1d after the end of DSS  
766 treatment. Bowels were dissected and measured and histologically processed for  
767 pathology assessment.

768 **Figure 2. Capsaicin-induced nociceptive behaviors are higher in female than male**  
769 **mice and the behavioral manifestation is sex-dependent.** (A) Timeline of behavioral  
770 experiments. Male and female mice were injected with intracolonic capsaicin (0.01% or  
771 0.03%) and capsaicin-evoked nociceptive responses, defined as licking, stretching,  
772 dragging, contractions of the abdomen, and freezing behaviors were recorded. (B-M)  
773 Total number of pain-related behaviors (B-C), licking bouts (D-E), dragging bouts (F-G),  
774 stretching bouts (H-I), contraction bouts (J-K) and time spent in freezing behavior (L-M)  
775 in vehicle control, 0.01% capsaicin and 0.03% capsaicin. Data is presented as mean  $\pm$   
776 SEM. n = 6-10 females and 5-9 males. \*p < 0.05, \*\*p < 0.01, \*\*\*p < 0.001: veh vs 0.01%  
777 cap; two-way ANOVA followed by Šídák's multiple comparisons test; ##p < 0.01: veh vs  
778 0.03% cap; unpaired t-test; §§p < 0.01: veh vs 0.03% cap; Mann Whitney test.

779 **Figure 3. Clinical progression of disease in a DSS-induced mouse model of colitis**  
780 **is sexually dimorphic.** (A) Timeline for the induction of experimental colitis. Male and  
781 female mice were treated with either 2.5% DSS or water, ad libitum for seven days.  
782 Disease Activity Index (DAI) cumulative score was obtained daily to monitor the

783 progression of DSS-induced colitis. (B) DAI score was dependent on the dose of DSS  
784 administered. (C-G) Cumulative DAI scores (C) and its individual components, defined as  
785 percentage of weight change (D), appearance (E), stool consistency (F) and fecal blood  
786 (G) were analyzed. Data is presented as mean  $\pm$  SEM. n = 6-12 females and 6-12 males.  
787 \*p < 0.05, \*\*p < 0.01, \*\*\*p < 0.001: male vs female; two-way ANOVA.

788 **Figure 4. Motivation to groom is comparable in both sexes after DSS-induced**  
789 **colitis.** (A) Timeline for splash test experiment. 10% sucrose solution was applied to the  
790 dorsal coat of control and DSS-treated male and female mice. (B-C) Coat state score (B),  
791 and total time spent grooming (C) were recorded. Data is presented as mean  $\pm$  SEM. n =  
792 5 females and 5 males. \*\*p < 0.01: control vs 5% DSS; two-way ANOVA.

793 **Figure 5. Capsaicin-induced hypersensitivity is comparable in male and female**  
794 **mice after DSS-induced colitis, but the behavioral manifestation is sex-dependent.**  
795 (A) Timeline of behavioral experiments. DSS-treated male and female mice were injected  
796 with intracolonic 0.01% capsaicin and capsaicin-evoked nociceptive responses, defined  
797 as licking, stretching, dragging, and contractions of the abdomen, and freezing behaviors  
798 were recorded. Total number of pain-related behaviors (B), licking bouts (C), dragging  
799 bouts (D), stretching bouts (E), contraction bouts (F) and time spent in freezing behavior  
800 (G) in vehicle control and 0.01% capsaicin. Data is presented as mean  $\pm$  SEM. n = 6-9  
801 females and 6-13 males. \*p < 0.05, \*\*p < 0.01, \*\*\*p < 0.001, \*\*\*\*p < 0.0001: veh vs 0.01%  
802 cap; two-way ANOVA followed by Šídák's multiple comparisons test.

803 **Figure 6. Referred abdominal hypersensitivity is sex dependent after acute but not**  
804 **persistent colon inflammation.** (A) Timeline for von Frey behavioral test in the context  
805 of acute and persistent colon irritation. Control and DSS-treated male and female mice

806 were injected with intracolonic 0.01% capsaicin or vehicle control and abdominal  
807 sensitivity to tactile stimulation was measured. (B) Quantification of response frequency  
808 to tactile stimulation of the abdomen in control and DSS-treated male and female mice  
809 after intracolonic injection of 0.01% capsaicin or vehicle control. Data is presented as  
810 mean  $\pm$  SEM. n = 6-13 males and 6-10 females. \*p < 0.05: control-0.01% cap vs DSS-  
811 0.01% cap, \*\*p < 0.01: control-0.01% cap vs DSS-0.01% cap, \*\*\*p < 0.001: control-veh  
812 vs control-0.01% cap, and \*\*\*\*p < 0.0001: DSS-veh vs DSS-0.01% cap; two-way ANOVA  
813 followed by Tukey's multiple comparisons test.

814 **Figure 7. DSS-induced bowel pathology is comparable in males and females.** (A)  
815 Timeline for bowel pathology analysis. Bowels of control and DSS-treated male and  
816 female mice were dissected, colon length was measured 1d after the end of DSS  
817 treatment and colonic samples were collected for histopathological analysis. (B)  
818 Representative images of control (top) and DSS-treated (bottom) colon samples. (C)  
819 Colon length in control and DSS-treated male and female mice. (D) Timeline for  
820 histological analysis of DSS-induced colon pathology. (E) Cumulative histology score in  
821 bowels from control and DSS-treated male and female mice and its individual  
822 components, defined as glands/mucosa score (F), inflammation score (G) and % colonic  
823 tissue affected (H). Data is presented as mean  $\pm$  SEM. n = 6-13 females and 5-21 males.  
824 \*p<0.05: males vs females and \*\*\*\*p<0.0001: control vs 2.5% DSS; two-way ANOVA  
825 followed by Tukey's multiple comparisons test.

826 **Figure 8. Summary of main findings.** (A) Behavioral manifestation of capsaicin-induced  
827 spontaneous visceral nociceptive responses is sex dependent after acute and persistent  
828 colon inflammation. After intracolonic capsaicin, females exhibit more capsaicin-induced

829 nociceptive behaviors than males. In the context of DSS-induced colitis, visceral  
830 hypersensitivity is comparable in both sexes, but the manifestation is distinct. (B) Referred  
831 abdominal hypersensitivity is higher in females after intracolonic capsaicin but is similar  
832 between sexes after persistent colon inflammation or at baseline. (C) Progression of DSS-  
833 induced colitis is sex dependent. Worse physical appearance and greater weight loss is  
834 observed in males compared to females. (D) No measurable sex difference was observed  
835 in DSS-induced bowel shortening.

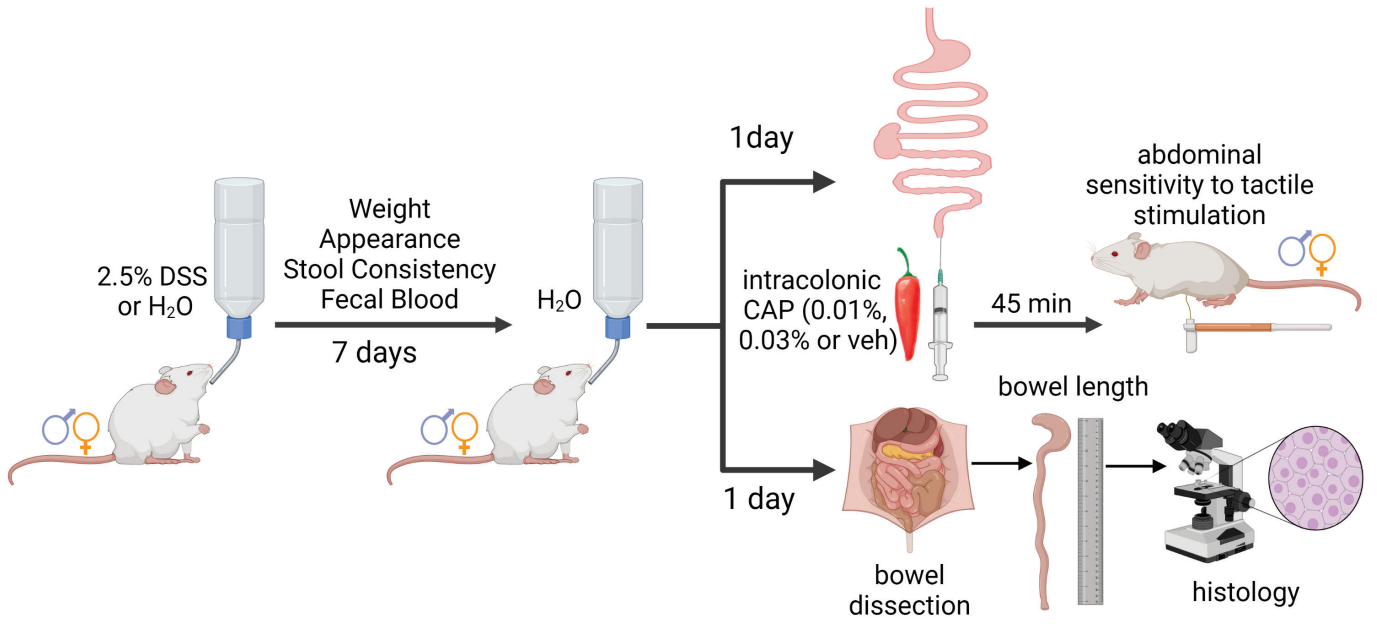

**Figure 1.**

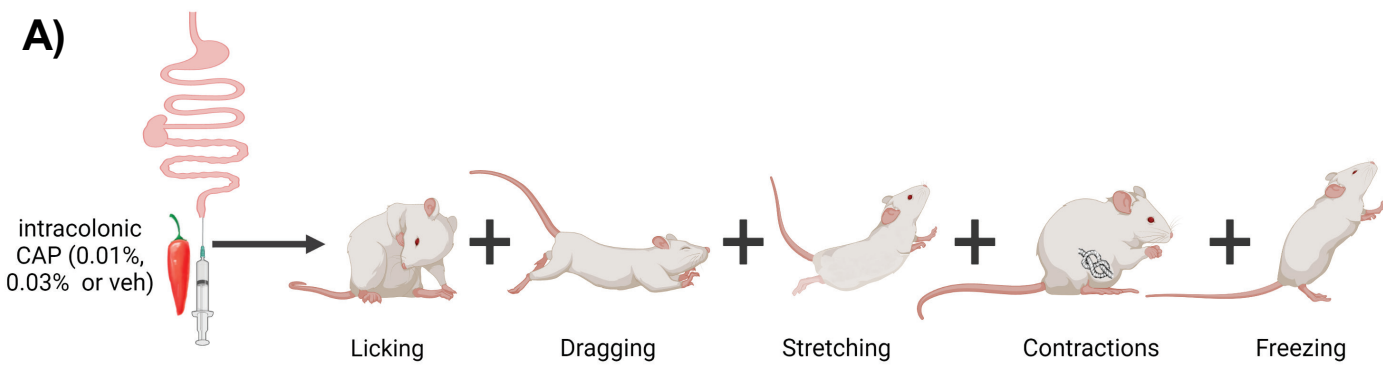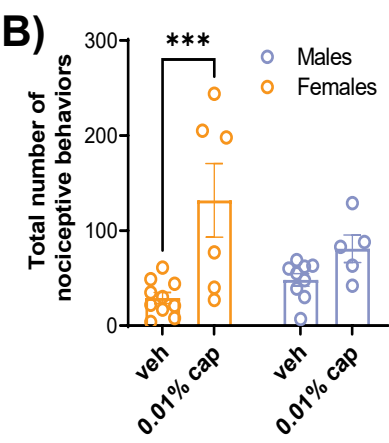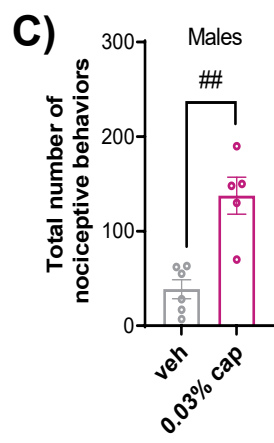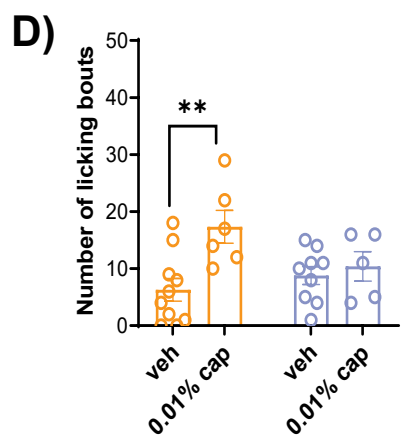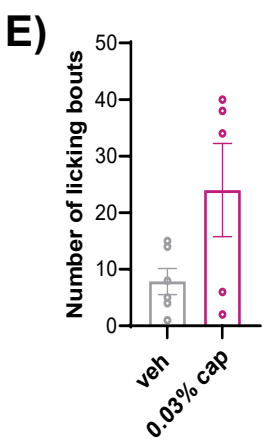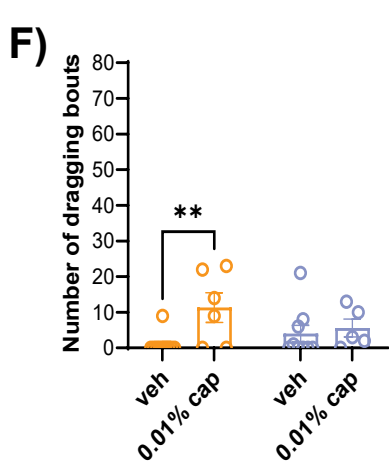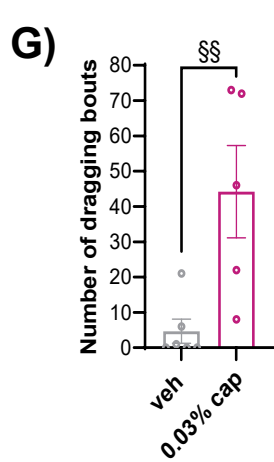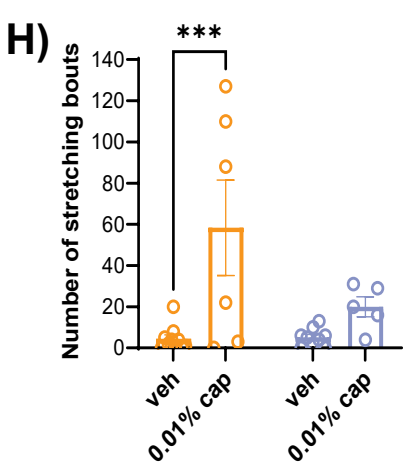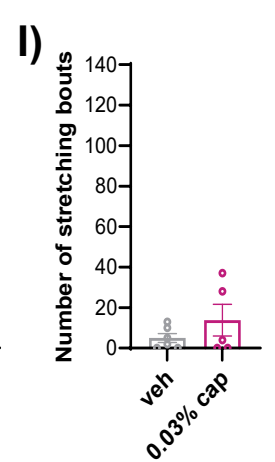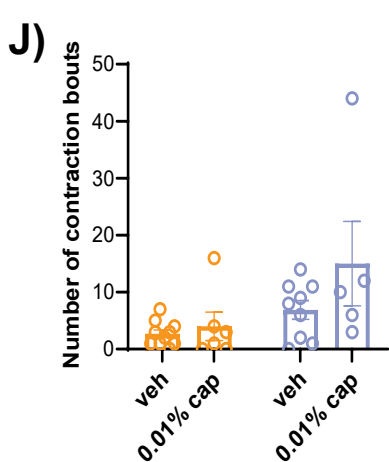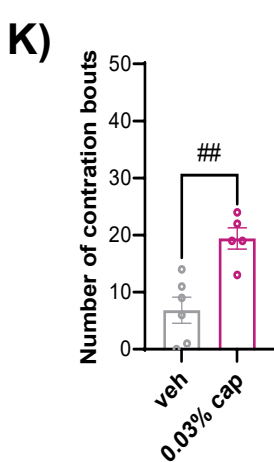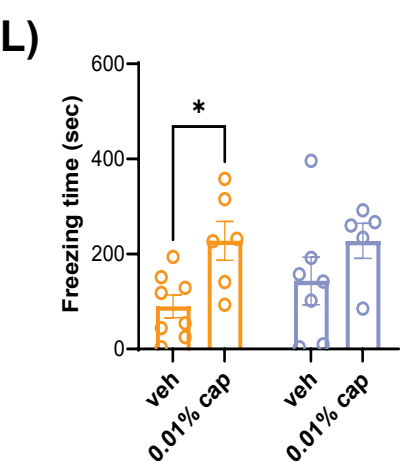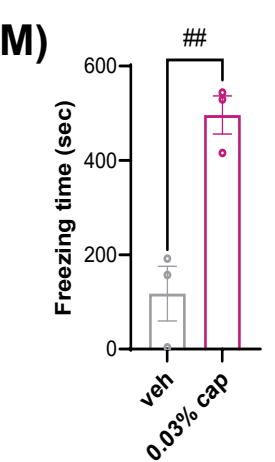

**Figure 2.**



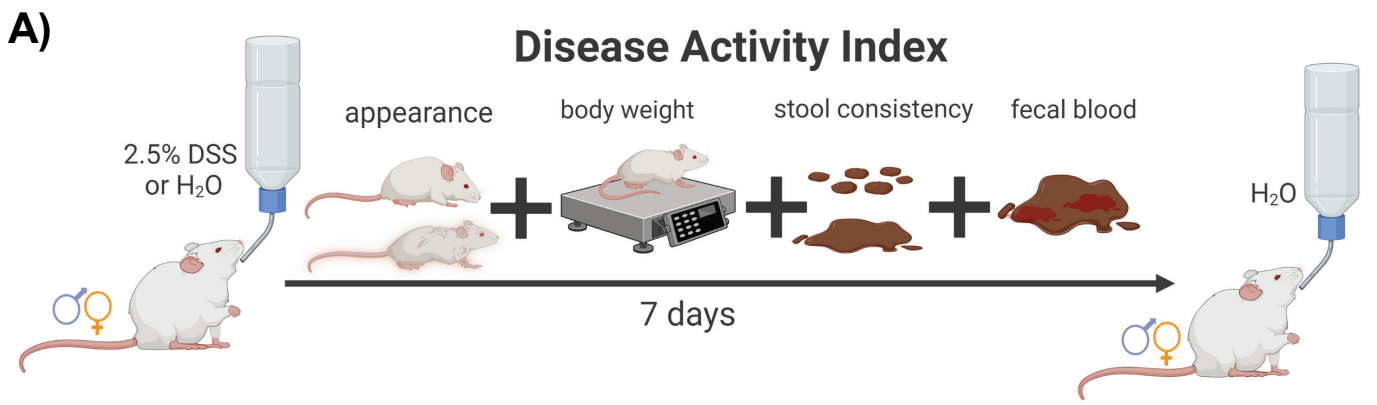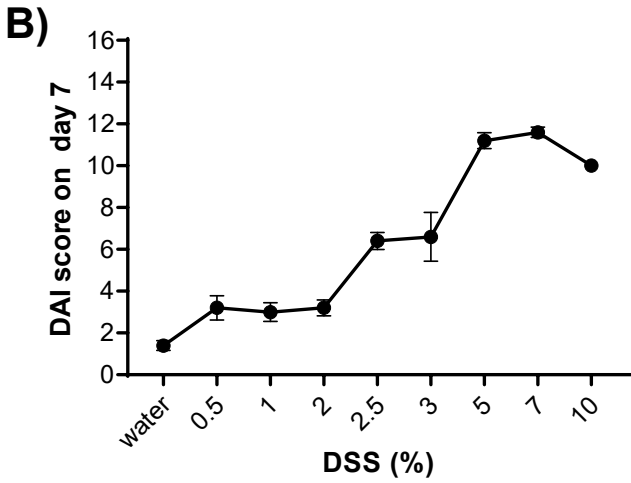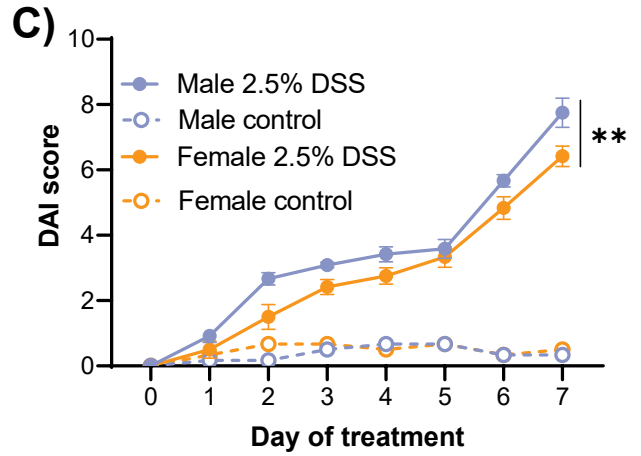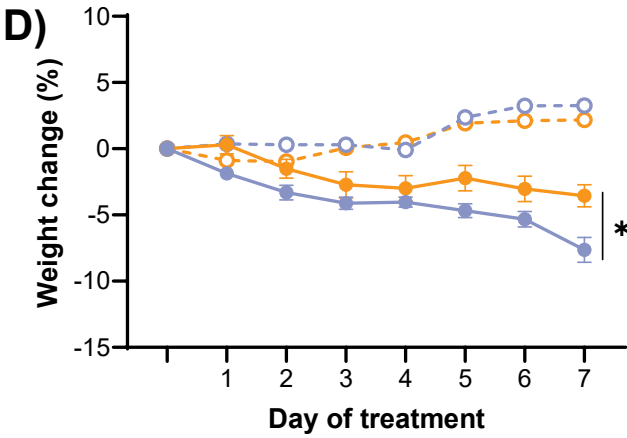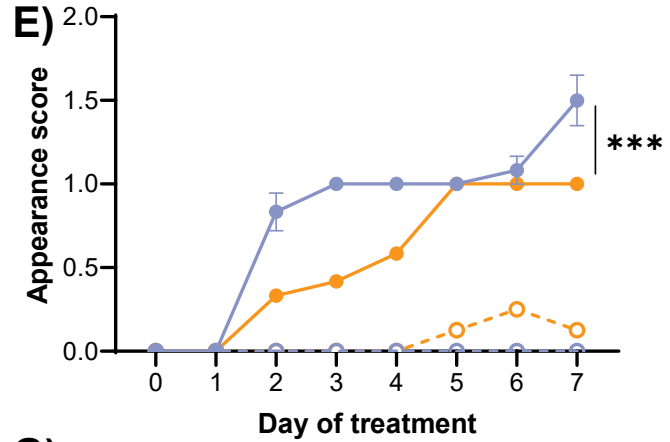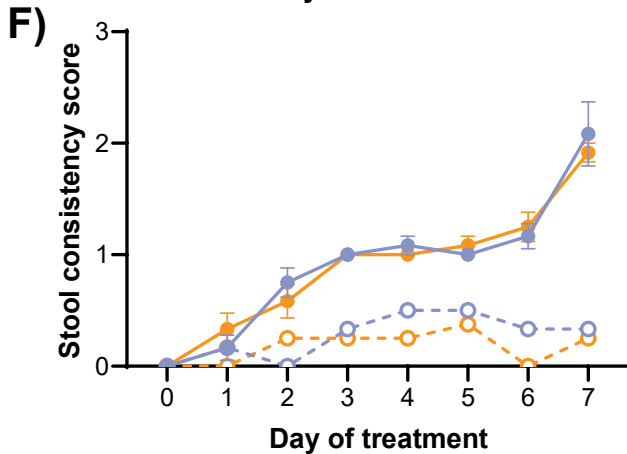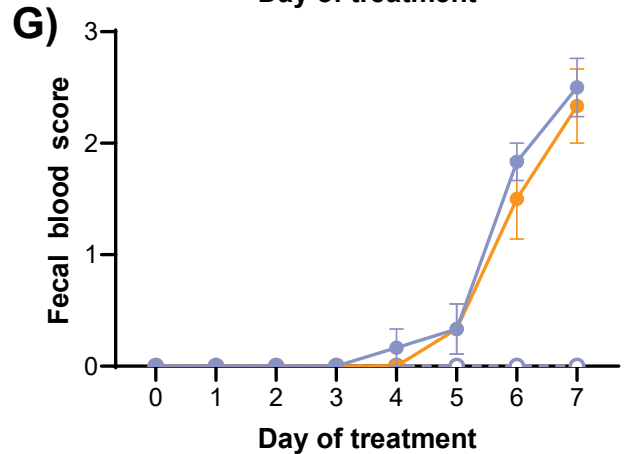

**Figure 3.**

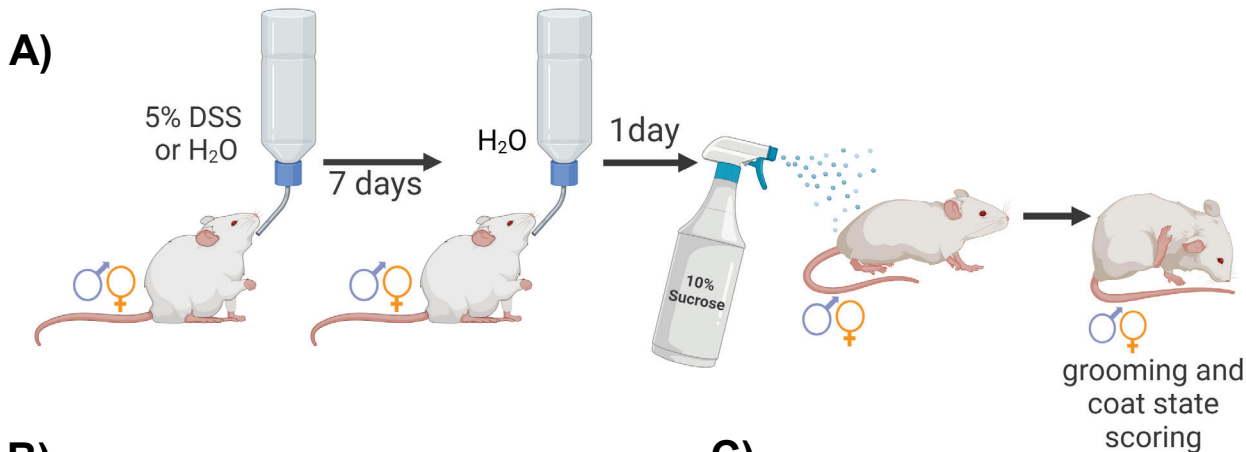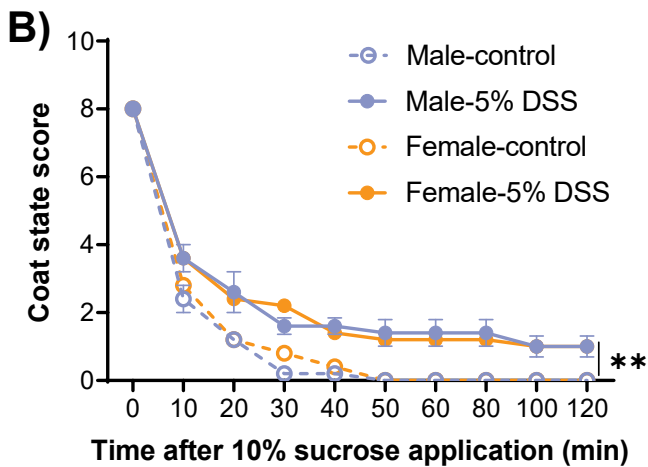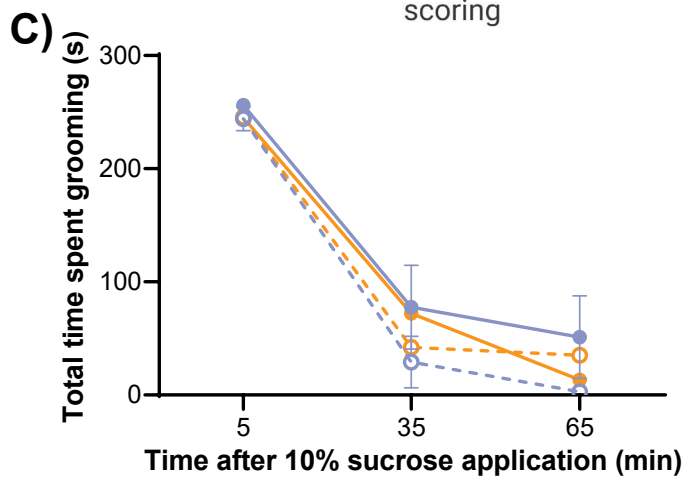

**Figure 4.**

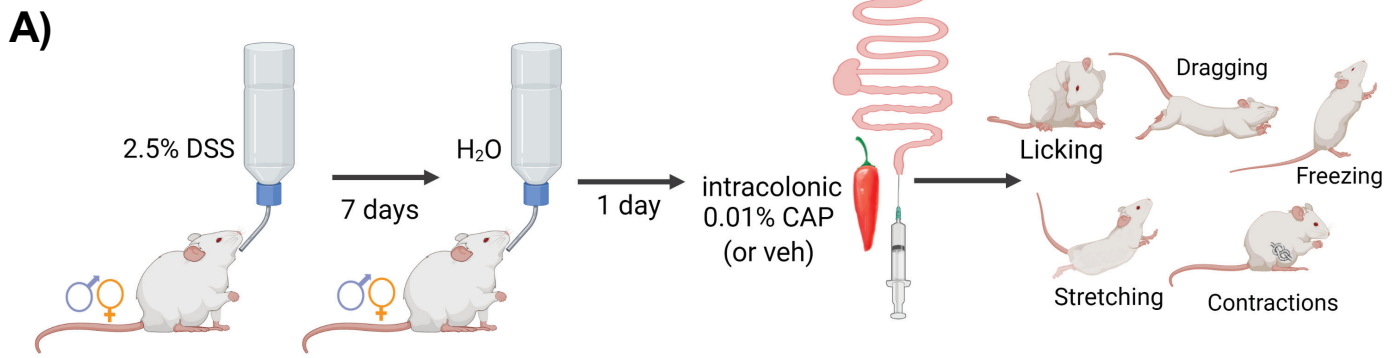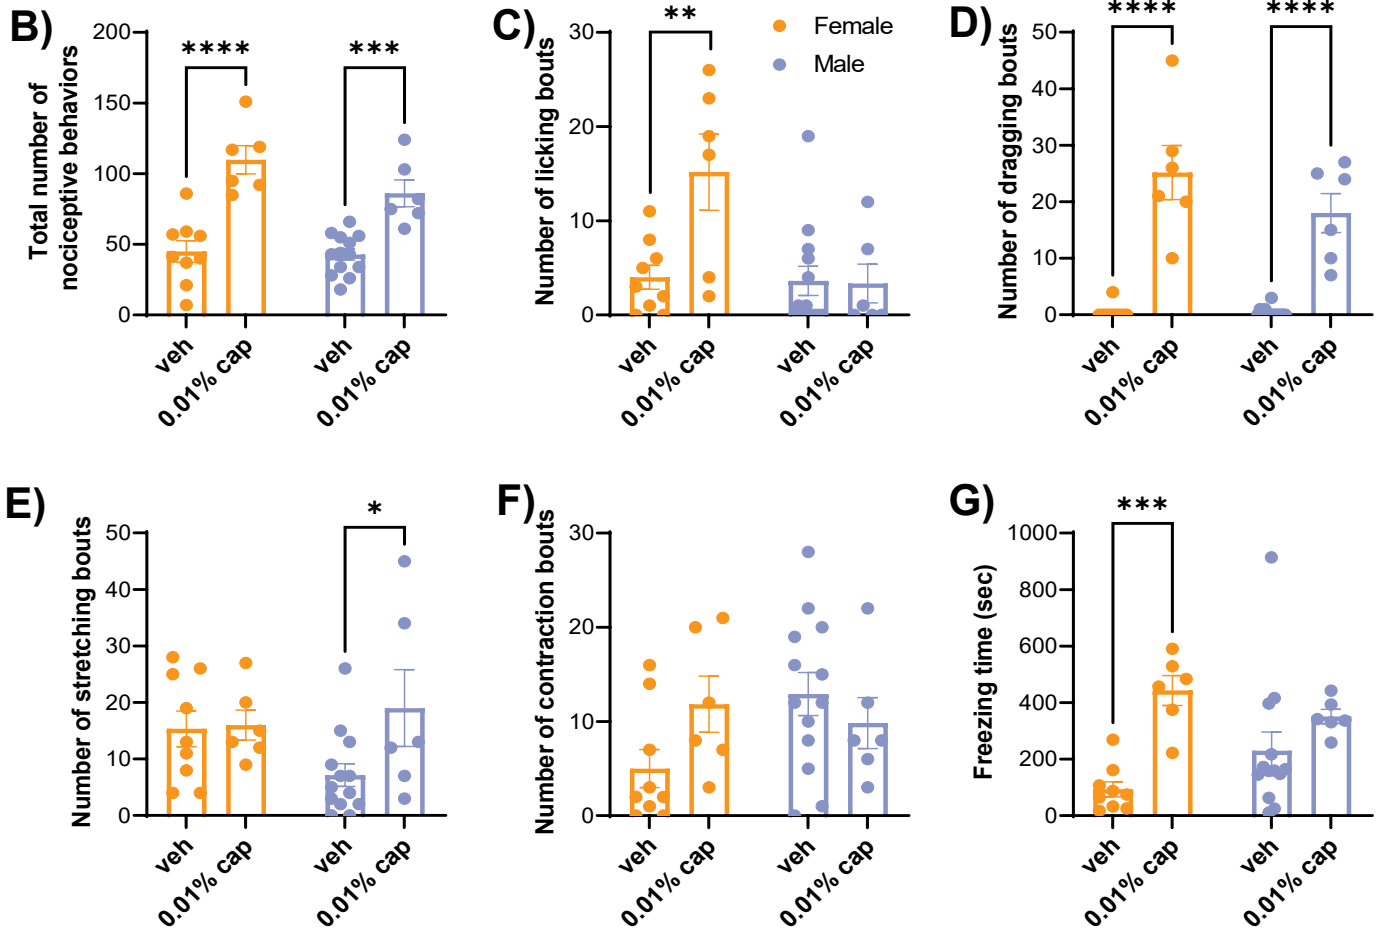

**Figure 5.**

A)

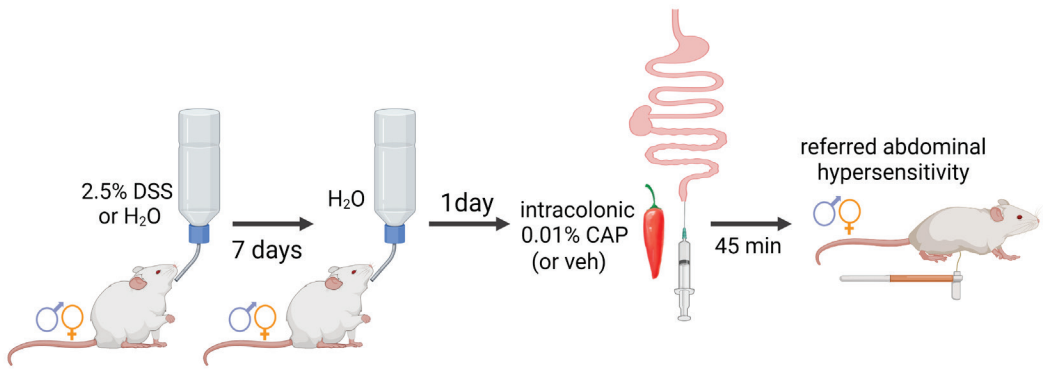

B)

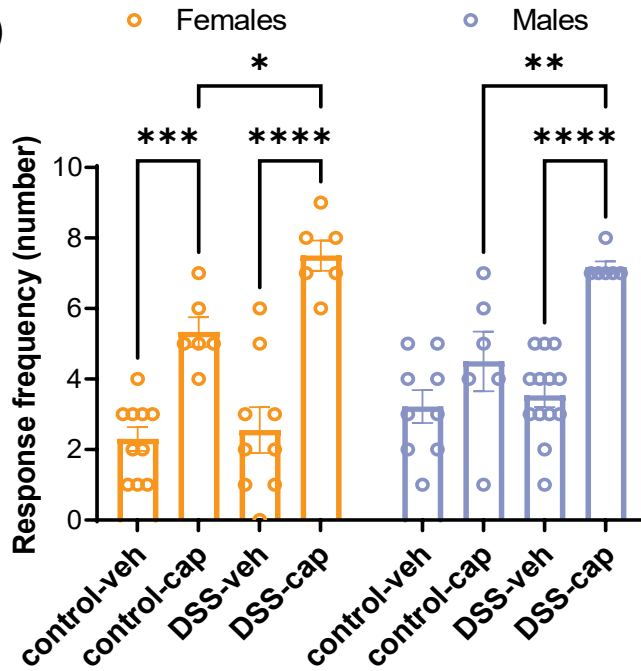

Figure 6.

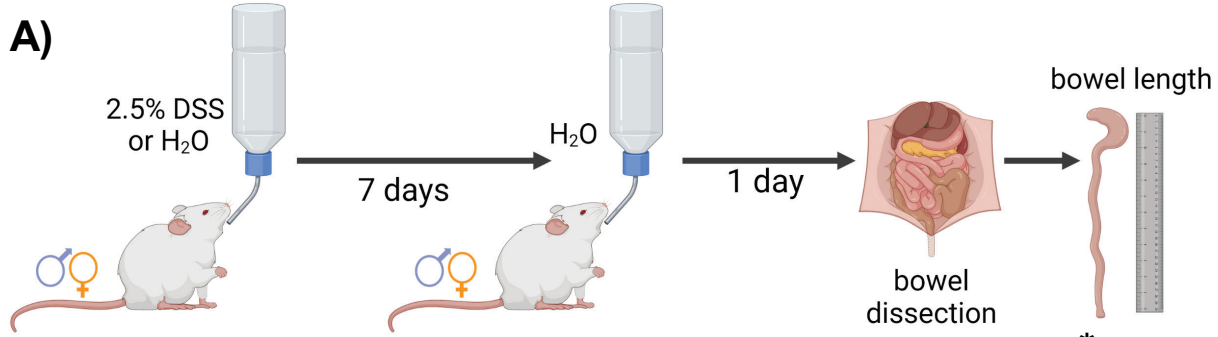

**B) Control Treatment**

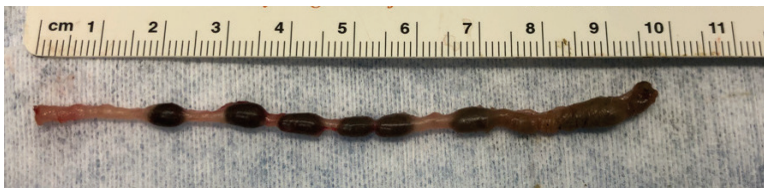

**DSS Treatment**

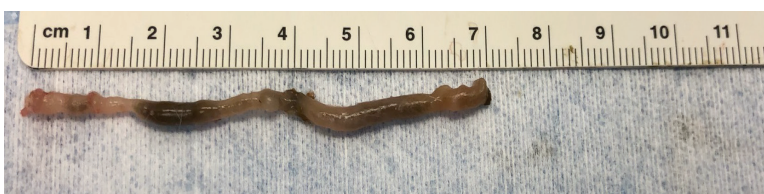

**C)**

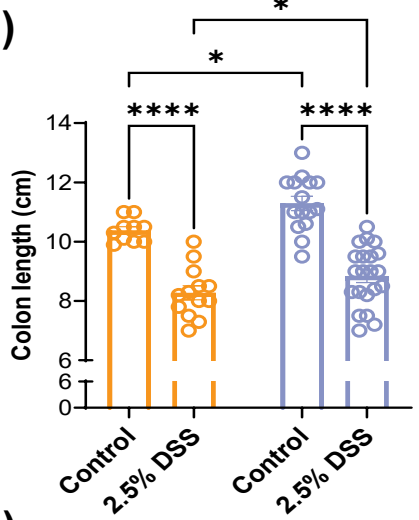

**D)**

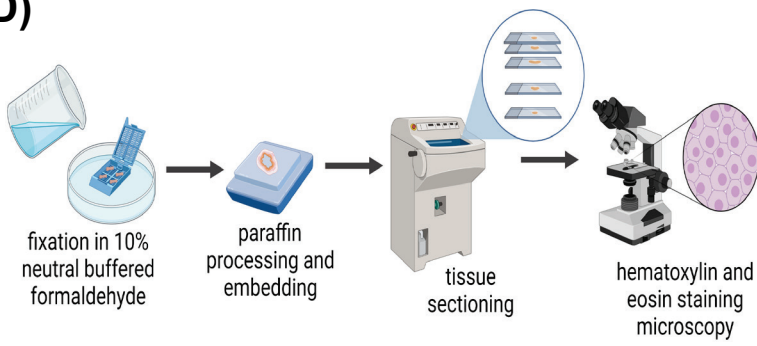

**E)**

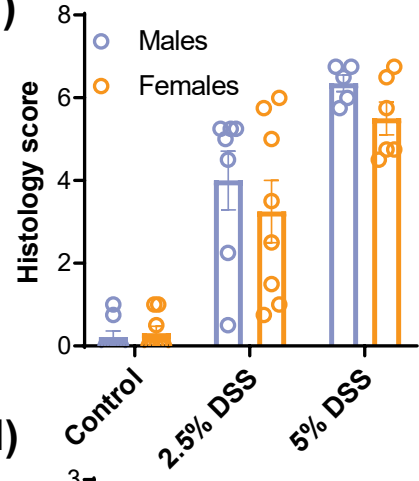

**F)**

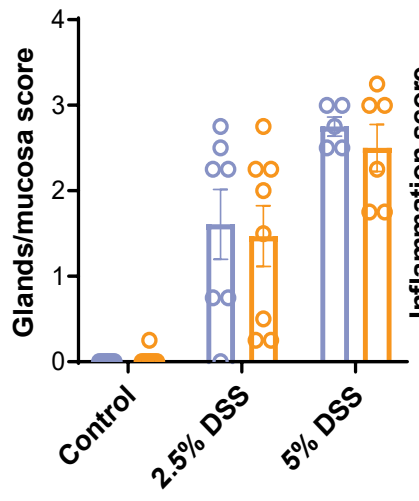

**G)**

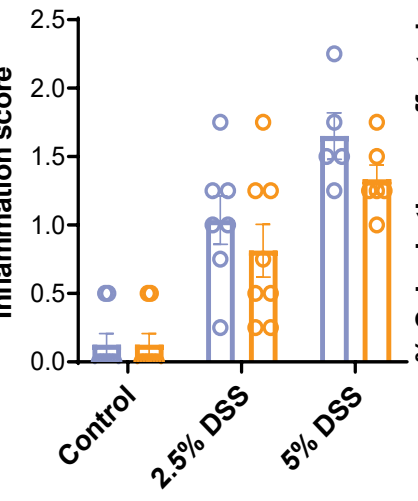

**H)**

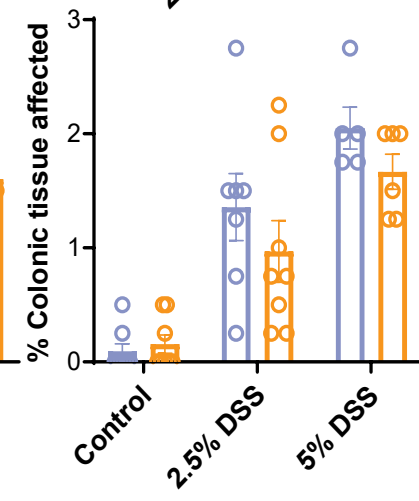

**Figure 7.**

## A) Spontaneous Visceral Responses

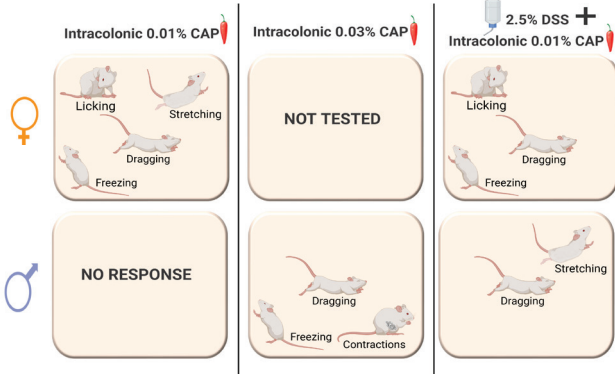

## B) Referred Abdominal Sensitivity

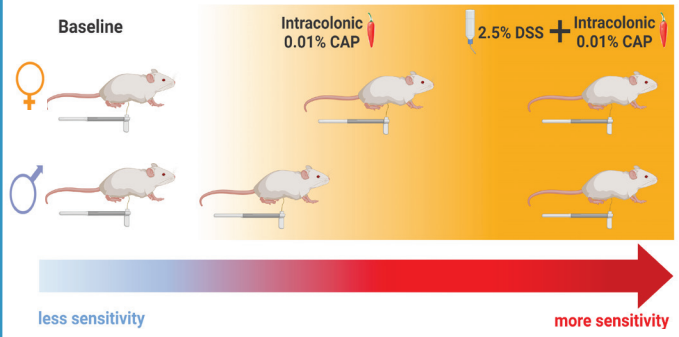

## C) Disease Progression

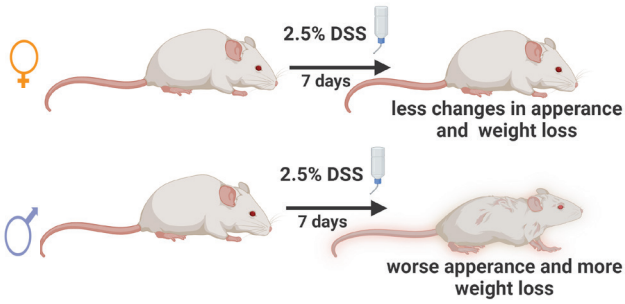

## D) Gross Colon Pathology

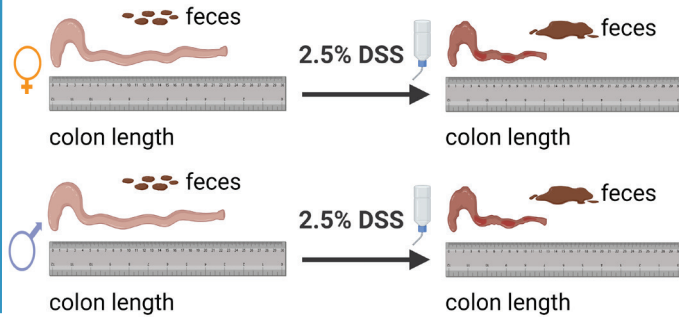

Figure 8.

| Score | Weight Loss (%) | Stool Consistency       | Fecal Blood                 | Appearance                       |
|-------|-----------------|-------------------------|-----------------------------|----------------------------------|
| 0     | None or gain    | Formed and hard         | Absence                     | “Normal”                         |
| 1     | 1-5             | Formed and soft         |                             | Scruffy                          |
| 2     | 5-10            | Loose stools/semiformed | Presence/hemoccult positive | Hunched and scruffy              |
| 3     | 10-15           | Mild diarrhea (watery)  |                             | Non-motile, hunched, and scruffy |
| 4     | 15 or more      | Gross diarrhea          | Gross bleeding              |                                  |

**Table 1. Disease Activity Index (DAI).** DAI score is the sum of the following components: the percentage of weight loss, stool consistency, fecal blood and appearance. Each individual component was scored according to the descriptions in the table.

| Disease Activity Index (DAI)   | Males           |                     | Females        |                    |
|--------------------------------|-----------------|---------------------|----------------|--------------------|
|                                | Water<br>(n= 6) | 2.5% DSS<br>(n= 12) | Water<br>(n=6) | 2.5% DSS<br>(n=12) |
| Day 1                          | -0.2 ± 0.2      | -0.9 ± 0.2**        | -0.3 ± 0.2     | -0.5 ± 0.3         |
| Day 2                          | -0.2 ± 0.2      | -2.7 ± 0.2****      | -0.7 ± 0.3     | -1.5 ± 0.4*        |
| Day 3                          | -0.5 ± 0.3      | -3.1 ± 0.1****      | -0.7 ± 0.3     | -2.4 ± 0.2****     |
| Day 4                          | -0.7 ± 0.3      | -3.4 ± 0.2****      | -0.5 ± 0.2     | -2.8 ± 0.3****     |
| Day 5                          | -0.7 ± 0.3      | -3.6 ± 0.3****      | -0.7 ± 0.5     | -3.3 ± 0.3****     |
| Day 6                          | -0.3 ± 0.2      | -5.7 ± 0.2****      | -0.3 ± 0.2     | -4.8 ± 0.3****     |
| Day 7                          | -0.3 ± 0.2      | -7.8 ± 0.4****      | -0.5 ± 0.3     | -6.4 ± 0.3****     |
| <b>Body Weight Loss (%)</b>    |                 |                     |                |                    |
| Day 1                          | -0.4 ± 0.4      | 1.9 ± 0.5*          | 0.9 ± 0.6      | -0.3 ± 0.7         |
| Day 2                          | -0.3 ± 0.9      | 3.3 ± 0.6***        | 1.0 ± 1.1      | 1.5 ± 0.7          |
| Day 3                          | -0.3 ± 0.9      | 4.1 ± 0.5****       | -0.1 ± 1.6     | 2.7 ± 1.0          |
| Day 4                          | 0.1 ± 1.2       | 4.0 ± 0.4****       | -0.5 ± 1.5     | 3.0 ± 1.0          |
| Day 5                          | -2.4 ± 1.1      | 4.7 ± 0.5****       | -1.9 ± 1.3     | 2.2 ± 1.0          |
| Day 6                          | -3.2 ± 0.8      | 5.3 ± 0.6****       | -2.1 ± 1.0     | 3.0 ± 1.0          |
| Day 7                          | -3.3 ± 1.0      | 7.7 ± 0.9****       | -2.2 ± 1.3     | 3.6 ± 0.8**        |
| <b>Appearance Score</b>        |                 |                     |                |                    |
| Day 1                          | 0               | 0                   | 0              | 0                  |
| Day 2                          | 0               | -0.8 ± 0.1****      | 0              | -0.3 ± 0.1         |
| Day 3                          | 0               | -1.0 ± 0.0****      | 0              | -0.4 ± 0.1         |
| Day 4                          | 0               | -1.0 ± 0.0****      | 0              | -0.6 ± 0.1*        |
| Day 5                          | 0               | -1.0 ± 0.0****      | -0.1 ± 0.1     | -1.0 ± 0.0****     |
| Day 6                          | 0               | -1.1 ± 0.1****      | -0.3 ± 0.2     | -1.0 ± 0.0****     |
| Day 7                          | 0               | -1.5 ± 0.2****      | -0.1 ± 0.1     | -1.0 ± 0.0****     |
| <b>Stool Consistency Score</b> |                 |                     |                |                    |
| Day 1                          | -0.2 ± 0.2      | -0.2 ± 0.1          | 0              | -0.3 ± 0.1         |
| Day 2                          | 0               | -0.8 ± 0.1***       | -0.3 ± 0.2     | -0.6 ± 0.1*        |
| Day 3                          | -0.3 ± 0.2      | -1.0 ± 0.0****      | -0.3 ± 0.2     | -1.0 ± 0.0****     |
| Day 4                          | -0.5 ± 0.2      | -1.1 ± 0.1****      | -0.3 ± 0.2     | -1.0 ± 0.0****     |
| Day 5                          | -0.5 ± 0.2      | -1.0 ± 0.0****      | -0.4 ± 0.2     | -1.1 ± 0.1****     |
| Day 6                          | -0.3 ± 0.2      | -1.2 ± 0.1****      | 0              | -1.3 ± 0.1****     |
| Day 7                          | -0.3 ± 0.2      | -2.1 ± 0.3***       | -0.3 ± 0.2     | -1.9 ± 0.1****     |
| <b>Fecal Blood Score</b>       |                 |                     |                |                    |
| Day 1                          | 0               | 0                   | 0              | 0                  |
| Day 2                          | 0               | 0                   | 0              | 0                  |
| Day 3                          | 0               | 0                   | 0              | 0                  |
| Day 4                          | 0               | -0.2 ± 0.2          | 0              | 0                  |
| Day 5                          | 0               | -0.3 ± 0.2          | 0              | -0.3 ± 0.2         |
| Day 6                          | 0               | -1.8 ± 0.2*         | 0              | -1.5 ± 0.4****     |
| Day 7                          | 0               | -2.5 ± 0.3***       | 0              | -2.3 ± 0.3****     |

**Table 2. Onset of individual disease activity index (DAI) components following DSS treatment in male and female mice.** Values are presented as the mean ± SEM difference from day 0 within the same treatment. \*p≤0.05, \*\*p≤0.01, \*\*\*p ≤ 0.001, \*\*\*\*p≤0.0001; Repeated Measures Two-Way ANOVA followed by Šídák's multiple comparisons test compared to day 0.
